# Supplementary material for: Antitumor Effects and Mechanisms of AZD4547 on FGFR2-Deregulated Endometrial Cancer Cells
Source: Oxford University Press journal article supplement (doi:10.1158/1535-7163.mct-15-0032), 2015-08-21
Supplement: 15357163mct150032-sup-143788_2_supp_3052996_nr9h87.docx [file 15357163mct150032-sup-143788_2_supp_3052996_nr9h87.docx]

Supplementary Data

**Antitumor effects and mechanisms of AZD4547 on FGFR2-deregulated endometrial cancer cells**

Yeonui Kwak1, Hanna Cho1, Wooyoung Hur2, Taebo Sim1,2,*

1KU-KIST Graduate School of Converging Science and Technology, 145, Anam-ro, Seongbuk-gu, Seoul, 136-713, Republic of Korea

2Chemical Kinomics Research Center, Korea Institute of Science and Technology, 5 Hwarangro 14 gil, Seongbuk-gu, Seoul 136-791, Republic of Korea

*Corresponding author: Taebo Sim, Ph.D. Tel:+82-2-958-6437; Fax: +82-2-958-5189; e-mail: tbsim@kist.re.kr, tbsim@korea.ac.kr


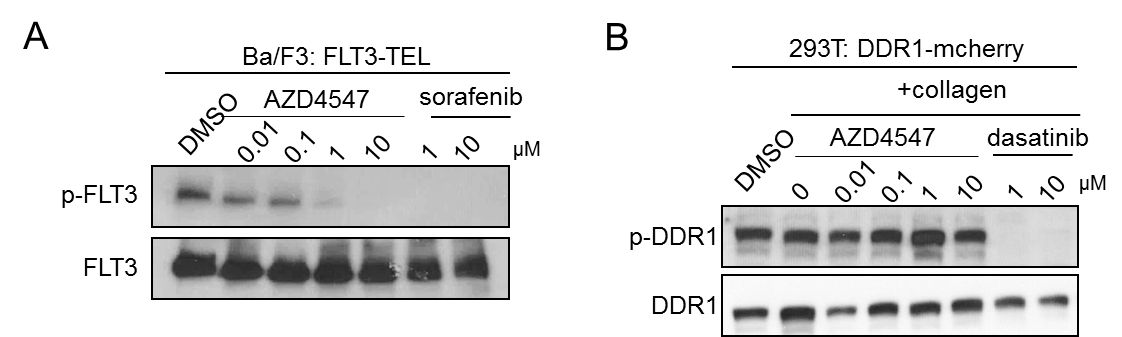


**Supplementary Figure S1. AZD4547 shows a moderate FLT3 inhibition and no DDR1 inhibition in cells.** Western blot analysis of FLT3-TEL-transformed Ba/F3 cells and HEK293T cells stably expressing DDR1-mCherry, after 2 h treatment with AZD4547 (0.01-10 μM) or sorafenib (1, 10 μM). AZD4547 at 1 μM effectively inhibited phosphorylation of FLT3 (Y591), whereas AZD4547 up to 10 μM did not block collagen-induced phospho-DDR1.


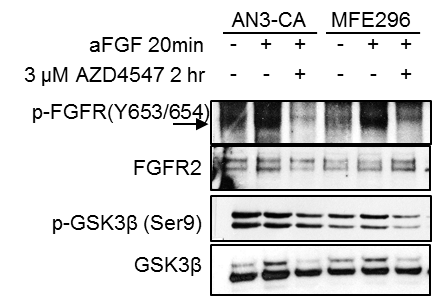


**Supplementary Figure S2. AZD4547 moderately inhibited p-GSK3 in both AN3-CA and MFE296 cells.** AZD4547 (3 M) was treated for 2 h before stimulation of aFGF for 20 min.

Supplementary Table S1. Primer sequences for RT-PCR analysis

| Gene Symbol | Sense | Antisense | product size (bp) |
| --- | --- | --- | --- |
| GAPDH | TCTTTCCCAATGCCG | GGAGATCCAACGACCTCTTCTCT | 108 |
| EGR1 | CTGACCGCAGAGTCTTTTCCTG | TGGGTGCCGCTGAGTAAATG | 325 |
| THBS1 | TGACAACAACGTGGTGAATGG | GAAAGACTGATCATAAACCAATGCT | 97 |
| SERTAD1 | CTAGTGAGCAAGATGCTGAGC | CTGGCCATGGAGGCTGAA AG | 362 |
| SERPINE 1 | AGACAGTTTCAGGCTGACTTCAC | GAAGGGTCTGTCCATGATGATCT | 177 |
| EMP1 | ATTGCCAATGTCTGGTTGGTTT | AGAACGCCGATGATGAAGCT | 380 |
| GDF-15/MIC-1 | ACTGCTGGCAGAATCTTCGT | AATGAGCACCATGGGATTGT | 352 |

Supplementary Table S2. *in vitro* inhibition profiling of AZD4547 at 1 μΜ against 336 human kinases

| Kinase: | % Activity |  | Kinase: | % Activity |  | Kinase: | % Activity |
| --- | --- | --- | --- | --- | --- | --- | --- |
| FGFR1 | -2.32 |  | CDK2/Cyclin A1 | 80.29 |  | MAPKAPK3 | 96.40 |
| KHS/MAP4K5 | -0.04 |  | CK1g2 | 80.49 |  | STK32B/YANK2 | 96.51 |
| FGFR2 | 0.30 |  | IKKe/IKBKE | 80.65 |  | PKCeta | 96.54 |
| IRR/INSRR | 1.55 |  | DCAMKL1 | 80.93 |  | CK1epsilon | 96.67 |
| GLK/MAP4K3 | 2.64 |  | IKKa/CHUK | 81.32 |  | SYK | 96.86 |
| FGFR3 | 2.97 |  | P38a/MAPK14 | 81.38 |  | MEK1 | 96.95 |
| DDR1 | 3.60 |  | PKG1a | 81.53 |  | EPHA4 | 97.04 |
| RET | 7.93 |  | CK1g3 | 81.68 |  | ALK3/BMPR1A | 97.50 |
| MELK | 8.47 |  | LRRK2 | 81.70 |  | CDC7/DBF4 | 97.52 |
| FLT3 | 8.66 |  | DLK/MAP3K12 | 81.90 |  | NLK | 97.61 |
| FGFR4 | 8.91 |  | STK25/YSK1 | 82.05 |  | TLK2 | 97.89 |
| FMS | 9.45 |  | c-MER | 82.88 |  | JNK3 | 97.94 |
| MARK4 | 10.70 |  | NEK2 | 83.02 |  | CLK3 | 98.01 |
| ARK5/NUAK1 | 13.12 |  | BMPR2 | 83.29 |  | RSK2 | 98.03 |
| MLCK2/MYLK2 | 14.02 |  | FRK/PTK5 | 84.35 |  | TAK1 | 98.06 |
| FLT4/VEGFR3 | 14.67 |  | ULK3 | 84.91 |  | PAK6 | 98.18 |
| HPK1/MAP4K1 | 15.81 |  | CAMK1g | 85.03 |  | BRAF | 98.18 |
| LOK/STK10 | 19.65 |  | MEKK1 | 85.05 |  | TEC | 98.20 |
| c-Kit | 21.73 |  | ALK5/TGFBR1 | 85.06 |  | ZIPK/DAPK3 | 98.23 |
| GCK/MAP4K2 | 22.57 |  | PHKg2 | 85.20 |  | NEK6 | 98.49 |
| FLT1/VEGFR1 | 24.01 |  | BRSK1 | 85.37 |  | PAK3 | 98.80 |
| YES/YES1 | 24.38 |  | CDK5/p35 | 85.50 |  | GRK3 | 98.83 |
| LYN | 24.53 |  | JAK1 | 85.71 |  | LCK2/ICK | 98.92 |
| KDR/VEGFR2 | 27.21 |  | ERK1 | 85.73 |  | SRMS | 99.07 |
| TNIK | 27.83 |  | CDK7/cyclin H | 85.95 |  | RON/MST1R | 99.14 |
| SIK2 | 27.97 |  | TAOK1 | 86.15 |  | MRCKa/CDC42BPA | 99.24 |
| STK22D/TSSK1 | 28.11 |  | NEK1 | 86.69 |  | MAPKAPK2 | 99.24 |
| FYN | 28.69 |  | CDK5/p25 | 86.72 |  | CAMK4 | 99.31 |
| MARK1 | 28.72 |  | MAPKAPK5/PRAK | 86.87 |  | PIM2 | 99.34 |
| LCK | 29.22 |  | CDK2/cyclin A | 87.01 |  | RAF1 | 99.49 |
| WNK3 | 29.55 |  | CDK2/cyclin E | 87.06 |  | NEK5 | 99.52 |
| WNK2 | 29.69 |  | MLCK/MYLK | 87.10 |  | PAK5 | 99.53 |
| MARK2/PAR-1Ba | 31.45 |  | TAOK3/JIK | 87.68 |  | CAMK1b | 99.55 |
| ABL2/ARG | 32.60 |  | ERBB4/HER4 | 87.83 |  | GRK2 | 99.66 |
| ACK1 | 32.90 |  | PKN3/PRK3 | 88.41 |  | EPHB2 | 99.77 |
| MARK3 | 34.15 |  | PKCtheta | 88.53 |  | JAK2 | 99.83 |
| ROS/ROS1 | 35.99 |  | DYRK1B | 88.84 |  | MYLK3 | 99.83 |
| CLK1 | 39.47 |  | BRSK2 | 88.87 |  | P38d/MAPK13 | 100.03 |
| ABL1 | 39.60 |  | TYRO3/SKY | 88.94 |  | CK2a | 100.06 |
| FAK/PTK2 | 40.58 |  | BRK | 89.04 |  | EPHB3 | 100.08 |
| ZAK/MLTK | 40.68 |  | DYRK1/DYRK1A | 89.15 |  | CDK1/cyclin B | 100.09 |
| PHKg1 | 41.03 |  | PAK1 | 89.21 |  | JNK1 | 100.09 |
| Aurora A | 41.40 |  | PKN1/PRK1 | 89.26 |  | p70S6Kb/RPS6KB2 | 100.14 |
| SIK1 | 41.97 |  | SRPK2 | 89.34 |  | HIPK2 | 100.18 |
| TIE2/TEK | 42.46 |  | FER | 89.44 |  | MKK4 | 100.33 |
| MLK1/MAP3K9 | 42.48 |  | NEK4 | 89.58 |  | CK1g1 | 100.69 |
| ALK | 44.28 |  | CDK9/cyclin T1 | 89.72 |  | PLK2 | 100.96 |
| MINK/MINK1 | 45.50 |  | RIPK5 | 89.99 |  | DYRK3 | 100.97 |
| MST1/STK4 | 45.72 |  | GSK3a | 90.11 |  | CK1a1 | 101.05 |
| CLK4 | 45.82 |  | CDK1/cyclin A | 90.27 |  | ZAP70 | 101.14 |
| CHK1 | 47.23 |  | CDK9/cyclin K | 90.39 |  | STK38/NDR1 | 101.37 |
| MLK3/MAP3K11 | 49.14 |  | STK32C/YANK3 | 90.59 |  | SSTK/TSSK6 | 101.46 |
| TYK2 | 49.26 |  | PKCa | 90.68 |  | MNK1 | 101.57 |
| Kinase: | % Activity |  | Kinase: | % Activity |  | Kinase: | % Activity |
| LYN B | 50.82 |  | LIMK1 | 90.84 |  | EPHA3 | 101.62 |
| MEKK2 | 52.39 |  | NEK9 | 91.21 |  | RIPK3 | 101.65 |
| Aurora B | 53.00 |  | TESK1 | 91.46 |  | PKAcg | 101.69 |
| c-Src | 53.10 |  | PKG1b | 91.46 |  | CK2a2 | 101.81 |
| SNARK/NUAK2 | 53.30 |  | CAMK2b | 91.59 |  | NEK7 | 101.90 |
| CAMKK1 | 54.65 |  | TLK1 | 91.67 |  | DMPK | 102.01 |
| CAMKK2 | 55.38 |  | EPHA6 | 91.68 |  | PKCnu/PRKD3 | 102.20 |
| BMX/ETK | 55.42 |  | PKAcb | 91.69 |  | TSSK2 | 102.24 |
| PDGFRb | 55.52 |  | COT1/MAP3K8 | 91.73 |  | EPHA5 | 102.77 |
| STK16 | 55.78 |  | STK39/STLK3 | 91.87 |  | LKB1 | 102.84 |
| Aurora C | 55.93 |  | CDK3/cyclin E | 92.03 |  | MNK2 | 103.03 |
| FGR | 56.67 |  | AKT1 | 92.16 |  | DAPK2 | 103.08 |
| HCK | 61.14 |  | MST2/STK3 | 92.20 |  | MSSK1/STK23 | 103.18 |
| IGF1R | 61.15 |  | SGK2 | 92.28 |  | PKCb1 | 103.31 |
| CDK4/cyclin D1 | 62.04 |  | PKN2/PRK2 | 92.33 |  | HIPK3 | 103.36 |
| TNK1 | 62.30 |  | MSK2/RPS6KA4 | 92.35 |  | TSSK3/STK22C | 103.40 |
| FES/FPS | 62.57 |  | HGK/MAP4K4 | 92.35 |  | ROCK1 | 103.66 |
| MEKK3 | 63.22 |  | PKA | 92.35 |  | ERK7/MAPK15 | 103.70 |
| BLK | 63.41 |  | TTBK1 | 92.41 |  | ERK5/MAPK7 | 103.75 |
| DCAMKL2 | 63.90 |  | DMPK2 | 92.46 |  | CTK/MATK | 103.77 |
| CLK2 | 64.85 |  | AKT2 | 92.62 |  | DYRK2 | 103.82 |
| EPHA2 | 64.86 |  | SGK1 | 92.64 |  | PKG2/PRKG2 | 103.84 |
| TXK | 66.41 |  | PDK1/PDPK1 | 92.92 |  | ARAF | 103.86 |
| CDK6/cyclin D1 | 66.44 |  | PKCepsilon | 93.42 |  | EPHA7 | 103.92 |
| BTK | 66.45 |  | CAMK2d | 93.42 |  | IRAK4 | 104.22 |
| TBK1 | 66.70 |  | PYK2 | 93.53 |  | ITK | 104.31 |
| AXL | 67.08 |  | PKCg | 93.53 |  | ALK1/ACVRL1 | 104.50 |
| MYO3b | 68.20 |  | GRK7 | 93.56 |  | PLK3 | 104.67 |
| IR | 68.95 |  | JNK2 | 93.88 |  | ASK1/MAP3K5 | 104.68 |
| RSK3 | 69.00 |  | PKCb2 | 93.91 |  | HIPK4 | 105.01 |
| TYK1/LTK | 69.02 |  | PLK1 | 94.01 |  | PKCzeta | 105.13 |
| SIK3 | 69.10 |  | PKCiota | 94.06 |  | PKCmu/PRKD1 | 105.80 |
| TAOK2/TAO1 | 69.98 |  | Haspin | 94.14 |  | VRK2 | 106.16 |
| STK33 | 70.20 |  | GRK5 | 94.16 |  | PKCd | 106.18 |
| CDK4/cyclin D3 | 70.79 |  | MKK6 | 94.24 |  | ERBB2/HER2 | 106.37 |
| CDK6/cyclin D3 | 71.08 |  | IKKb/IKBKB | 94.33 |  | PAK4 | 106.82 |
| MEK2 | 71.41 |  | PASK | 94.35 |  | P38b/MAPK11 | 106.87 |
| WNK1 | 72.54 |  | PAK2 | 94.58 |  | c-MET | 106.97 |
| EPHB1 | 72.84 |  | CDK1/cyclin E | 94.65 |  | DYRK4 | 107.09 |
| CSK | 73.12 |  | GRK4 | 94.70 |  | NEK3 | 108.30 |
| RIPK2 | 73.61 |  | EGFR | 94.85 |  | MRCKb/CDC42BPB | 108.83 |
| RSK1 | 74.08 |  | PIM1 | 94.89 |  | PBK/TOPK | 109.41 |
| CAMK1a | 74.39 |  | EPHA8 | 94.89 |  | MSK1/RPS6KA5 | 109.82 |
| PLK4/SAK | 74.48 |  | DRAK1/STK17A | 95.04 |  | P38g | 110.46 |
| PDGFRa | 74.75 |  | p70S6K/RPS6KB1 | 95.12 |  | AKT3 | 110.86 |
| MLK2/MAP3K10 | 75.12 |  | CK1d | 95.17 |  | IRAK1 | 111.01 |
| WEE1 | 75.62 |  | OSR1/OXSR1 | 95.17 |  | ERK2/MAPK1 | 111.89 |
| VRK1 | 75.77 |  | GRK1 | 95.20 |  | NEK11 | 111.93 |
| EPHA1 | 75.78 |  | PIM3 | 95.34 |  | HIPK1 | 112.28 |
| MUSK | 76.12 |  | STK38L/NDR2 | 95.51 |  | CAMK2g | 112.54 |
| ULK1 | 76.12 |  | SRPK1 | 95.58 |  | SGK3/SGKL | 113.17 |
| GSK3b | 77.17 |  | LATS1 | 95.68 |  | MST4 | 117.67 |
| EPHB4 | 78.28 |  | MEK3 | 95.73 |  | DAPK1 | 118.11 |
| SLK/STK2 | 78.87 |  | ROCK2 | 95.75 |  | RSK4 | 119.41 |
| PRKX | 79.06 |  | LATS2 | 95.81 |  | LIMK2 | 123.07 |
| Kinase: | % Activity |  | Kinase: | % Activity |  | Kinase: | % Activity |
| ULK2 | 79.46 |  | PKD2/PRKD2 | 95.93 |  | TGFBR2 | 124.38 |
| CDK16/cyclinY | 80.03 |  | TTBK2 | 96.21 |  | CAMK1d | 138.92 |
| DDR2 | 80.20 |  | JAK3 | 96.22 |  | MST3/STK24 | 171.94 |
| CHK2 | 80.28 |  | GRK6 | 96.40 |  | CAMK2a | 188.78 |

Supplementary Table S3. Upregulated genes in (DMSO+aFGF)-treated AN3-CA cells compared with the DMSO-treated cells (18 h)

| **Probe Set ID** | **Gene Symbol** | **Description** | **Genbank Accession ID** | **UniGeneID** | **Fold Change** | **p-value** |
| --- | --- | --- | --- | --- | --- | --- |
| 11717566_at | EMP1 | epithelial membrane protein 1 | NM_001423 | Hs.707901 | 43.428555 | 0.000204 |
| 11717564_a_at | EMP1 | epithelial membrane protein 1 | NM_001423 | Hs.707901 | 28.390452 | 0.000216 |
| 11757312_x_at | SERPINE1 | serpin peptidase inhibitor, clade E (nexin, plasminogen activator inhibitor type 1), member 1 | NM_000602 | Hs.713079 | 25.492143 | 0.000049 |
| 11717565_s_at | EMP1 | epithelial membrane protein 1 | NM_001423 | Hs.707901 | 21.21869 | 0.000069 |
| 11746856_a_at | SERPINE1 | serpin peptidase inhibitor, clade E (nexin, plasminogen activator inhibitor type 1), member 1 | NM_000602 | Hs.414795 | 19.696819 | 0.000182 |
| 11720027_x_at | VGF | VGF nerve growth factor inducible | NM_003378 | Hs.718797 | 16.710811 | 0.000043 |
| 11721307_at | PHLDA1 | pleckstrin homology-like domain, family A, member 1 | NM_007350 | Hs.602085 | 16.685151 | 0.003002 |
| 11715636_a_at | SERPINE1 | serpin peptidase inhibitor, clade E (nexin, plasminogen activator inhibitor type 1), member 1 | NM_000602 | Hs.414795 | 14.42356 | 0.000163 |
| 11720026_a_at | VGF | VGF nerve growth factor inducible | NM_003378 | Hs.718797 | 13.869862 | 0.000268 |
| 11721305_a_at | PHLDA1 | pleckstrin homology-like domain, family A, member 1 | NM_007350 | Hs.602085 | 11.552817 | 0.000980 |
| 11717862_x_at | EGR1 | early growth response 1 | NM_001964 | Hs.326035 | 9.5933263 | 0.001223 |
| 11717860_a_at | EGR1 | early growth response 1 | NM_001964 | Hs.326035 | 8.7558747 | 0.000010 |
| 11752940_a_at | EGR1 | early growth response 1 | NM_001964 | Hs.326035 | 8.5763093 | 0.000546 |
| 11754334_s_at | EGR1 | early growth response 1 | NM_001964 | Hs.708393 | 8.2101254 | 0.000119 |
| 11758619_s_at | LIF | leukemia inhibitory factor (cholinergic differentiation factor) | NM_002309 | Hs.605598 | 7.7120056 | 0.000003 |
| 11716663_a_at | GDF15 | growth differentiation factor 15 | NM_004864 | Hs.616962 | 7.5887237 | 0.000006 |
| 11729128_at | CPA4 | carboxypeptidase A4 | NM_001163446 | Hs.93764 | 7.299304 | 0.004156 |
| 11716665_s_at | GDF15 | growth differentiation factor 15 | NM_004864 | Hs.616962 | 7.2038379 | 0.000017 |
| 11726497_at | LIF | leukemia inhibitory factor (cholinergic differentiation factor) | NM_002309 | Hs.2250 | 6.7890929 | 0.004903 |
| 11717861_a_at | EGR1 | early growth response 1 | NM_001964 | Hs.326035 | 6.2298247 | 0.000121 |
| 11718779_at | S100A2 | S100 calcium binding protein A2 | NM_005978 | Hs.516484 | 6.2110001 | 0.001773 |
| 11716664_x_at | GDF15 | growth differentiation factor 15 | NM_004864 | Hs.616962 | 6.1108345 | 0.002561 |
| 11725767_at | CLCF1 | cardiotrophin-like cytokine factor 1 | NM_001166212 | Hs.502977 | 6.0503822 | 0.003976 |
| 11726498_at | LIF | leukemia inhibitory factor (cholinergic differentiation factor) | NM_002309 | Hs.2250 | 5.4251549 | 0.002683 |
| 11721308_at | PHLDA1 | pleckstrin homology-like domain, family A, member 1 | NM_007350 | Hs.602085 | 5.2533937 | 0.002053 |
| 11734659_a_at | FOS | FBJ murine osteosarcoma viral oncogene homolog | NM_005252 | Hs.707896 | 4.5279646 | 0.002499 |
| 11718397_s_at | JUN | jun proto-oncogene | NM_002228 | Hs.714791 | 4.3961898 | 0.000079 |
| 11721911_at | SOX8 | SRY (sex determining region Y)-box 8 | NM_014587 | Hs.243678 | 4.3095605 | 0.000057 |
| 11721092_a_at | THBS1 | thrombospondin 1 | NM_003246 | Hs.164226 | 4.1300004 | 0.000135 |
| 11751643_x_at | EGR1 | early growth response 1 | NM_001964 | Hs.326035 | 3.9825153 | 0.000374 |
| **Probe Set ID** | **Gene Symbol** | **Description** | **Genbank Accession ID** | **UniGeneID** | **Fold Change** | **p-value** |
| 11745020_a_at | TNFRSF12A | tumor necrosis factor receptor superfamily, member 12A | NM_016639 | Hs.355899 | 3.9727297 | 0.000904 |
| 11747820_x_at | UPP1 | uridine phosphorylase 1 | NM_003364 | Hs.488240 | 3.9127862 | 0.001923 |
| 11718395_s_at | JUN | jun proto-oncogene | NM_002228 | Hs.714791 | 3.8905201 | 0.006222 |
| 11744953_a_at | ANXA1 | annexin A1 | NM_000700 | Hs.494173 | 3.8893902 | 0.000075 |
| 11721093_a_at | THBS1 | thrombospondin 1 | NM_003246 | Hs.164226 | 3.8664465 | 0.000134 |
| 11718394_at | JUN | jun proto-oncogene | NM_002228 | Hs.714791 | 3.8239756 | 0.001548 |
| 11725768_a_at | CLCF1 | cardiotrophin-like cytokine factor 1 | NM_001166212 | Hs.502977 | 3.7900609 | 0.000898 |
| 11717514_a_at | ANXA1 | annexin A1 | NM_000700 | Hs.494173 | 3.7862711 | 0.002209 |
| 11720030_a_at | SCG2 | secretogranin II | NM_003469 | Hs.516726 | 3.7707534 | 0.007407 |
| 11744954_x_at | ANXA1 | annexin A1 | NM_000700 | Hs.494173 | 3.7651609 | 0.001323 |
| 11725809_at | ARC | activity-regulated cytoskeleton-associated protein | NM_015193 | Hs.40888 | 3.7097183 | 0.001375 |
| 11749291_a_at | FOS | FBJ murine osteosarcoma viral oncogene homolog | NM_005252 | Hs.707896 | 3.703442 | 0.005985 |
| 11716048_at | TRIB1 | tribbles homolog 1 (Drosophila) | NM_025195 | Hs.444947 | 3.6424877 | 0.000282 |
| 11744955_a_at | ANXA1 | annexin A1 | NM_000700 | Hs.494173 | 3.6044958 | 0.000057 |
| 11721306_at | PHLDA1 | pleckstrin homology-like domain, family A, member 1 | NM_007350 | Hs.602085 | 3.5707778 | 0.000186 |
| 11715493_a_at | CYR61 | cysteine-rich, angiogenic inducer, 61 | NM_001554 | Hs.8867 | 3.569439 | 0.000851 |
| 11749378_a_at | CLCF1 | cardiotrophin-like cytokine factor 1 | NM_001166212 | Hs.502977 | 3.5271855 | 0.000949 |
| 11759482_at | WWTR1 | WW domain containing transcription regulator 1 | NM_001168278 | Hs.719249 | 3.484629 | 0.003720 |
| 11737922_a_at | SERPINB8 | serpin peptidase inhibitor, clade B (ovalbumin), member 8 | NM_001031848 | Hs.368077 | 3.4355639 | 0.002319 |
| 11725382_a_at | RAPGEF3 | Rap guanine nucleotide exchange factor (GEF) 3 | NM_001098531 | Hs.8578 | 3.3888406 | 0.007147 |
| 11757721_s_at | CSRNP1 | cysteine-serine-rich nuclear protein 1 | NM_033027 | Hs.593170 | 3.3694968 | 0.001635 |
| 11748775_a_at | UPP1 | uridine phosphorylase 1 | NM_003364 | Hs.488240 | 3.3420928 | 0.000158 |
| 11722503_at | ITGB8 | integrin, beta 8 | NM_002214 | Hs.592171 | 3.226968 | 0.003505 |
| 11743682_s_at | KLF10 | Kruppel-like factor 10 | NM_001032282 | Hs.435001 | 3.2255245 | 0.003293 |
| 11749103_a_at | ITGB8 | integrin, beta 8 | NM_002214 | Hs.592171 | 3.2018482 | 0.003908 |
| 11733068_s_at | KLF10 | Kruppel-like factor 10 | NM_001032282 | Hs.435001 | 3.2003153 | 0.003588 |
| 11721091_a_at | THBS1 | thrombospondin 1 | NM_003246 | Hs.164226 | 3.1959641 | 0.007623 |
| 11748180_a_at | SERPINB8 | serpin peptidase inhibitor, clade B (ovalbumin), member 8 | NM_001031848 | Hs.368077 | 3.1810482 | 0.001110 |
| 11718631_at | SERTAD1 | SERTA domain containing 1 | NM_013376 | Hs.269898 | 3.16203 | 0.000889 |
| 11720618_s_at | TRIM9 | tripartite motif-containing 9 | NM_015163 | Hs.654750 | 3.1535699 | 0.003472 |
| 11749905_a_at | CYR61 | cysteine-rich, angiogenic inducer, 61 | NM_001554 | Hs.8867 | 3.1157316 | 0.000054 |
| 11725606_at | TRIM9 | tripartite motif-containing 9 | NM_015163 | Hs.654750 | 3.0999919 | 0.000088 |
| 11751672_x_at | LGALS8 | lectin, galactoside-binding, soluble, 8 | NM_006499 | Hs.4082 | 3.08404 | 0.002001 |
| 11719836_x_at | LGALS8 | lectin, galactoside-binding, soluble, 8 | NM_006499 | Hs.4082 | 3.0565893 | 0.001188 |
| 11732321_a_at | PLAT | plasminogen activator, tissue | NM_000930 | Hs.491582 | 3.042418 | 0.001309 |
| 11726299_x_at | LGALS8 | lectin, galactoside-binding, soluble, 8 | NM_006499 | Hs.4082 | 3.037787 | 0.003366 |
| **Probe Set ID** | **Gene Symbol** | **Description** | **Genbank Accession ID** | **UniGeneID** | **Fold Change** | **p-value** |
| 11725983_at | BHLHE40 | basic helix-loop-helix family, member e40 | NM_003670 | Hs.719093 | 3.0242297 | 0.006646 |
| 11754545_x_at | PLAT | plasminogen activator, tissue | NM_000930 | Hs.491582 | 2.9531666 | 0.008259 |
| 11753073_a_at | TNFSF4 | tumor necrosis factor (ligand) superfamily, member 4 | NM_003326 | Hs.181097 | 2.9079857 | 0.003014 |
| 11731896_a_at | TNFSF4 | tumor necrosis factor (ligand) superfamily, member 4 | NM_003326 | Hs.181097 | 2.8819625 | 0.006336 |
| 11755099_a_at | WWTR1 | WW domain containing transcription regulator 1 | NM_001168278 | Hs.719249 | 2.8343177 | 0.008242 |
| 11751671_a_at | LGALS8 | lectin, galactoside-binding, soluble, 8 | NM_006499 | Hs.4082 | 2.832355 | 0.009098 |
| 11720062_s_at | IER3 | immediate early response 3 | NM_003897 | Hs.591785 | 2.8102177 | 0.000484 |
| 11759483_at | WWTR1 | WW domain containing transcription regulator 1 | NM_001168278 | Hs.719249 | 2.7829913 | 0.008166 |
| 11726298_s_at | LGALS8 | lectin, galactoside-binding, soluble, 8 | NM_006499 | Hs.4082 | 2.7755559 | 0.000080 |
| 11720617_at | TRIM9 | tripartite motif-containing 9 | NM_015163 | Hs.654750 | 2.7690192 | 0.001995 |
| 11749809_a_at | PLAT | plasminogen activator, tissue | NM_000930 | Hs.491582 | 2.7344056 | 0.001471 |
| 11740780_at | FOXD2 | forkhead box D2 | NM_004474 | Hs.166188 | 2.705326 | 0.003465 |
| 11724454_at | SLC22A4 | solute carrier family 22 (organic cation/ergothioneine transporter), member 4 | NM_003059 | Hs.310591 | 2.6875761 | 0.009421 |
| 11726784_a_at | LRFN5 | leucine rich repeat and fibronectin type III domain containing 5 | NM_152447 | Hs.715685 | 2.6795257 | 0.001428 |
| 11761141_x_at | LGALS8 | lectin, galactoside-binding, soluble, 8 | NM_006499 | Hs.4082 | 2.6556682 | 0.004962 |
| 11736018_x_at | PXN | paxillin | NM_001080855 | Hs.446336 | 2.6484638 | 0.004233 |
| 11724902_a_at | MAP3K14 | mitogen-activated protein kinase kinase kinase 14 | NM_003954 | Hs.404183 | 2.6107301 | 0.006754 |
| 11717617_a_at | PXN | paxillin | NM_001080855 | Hs.446336 | 2.5721512 | 0.000036 |
| 11727623_at | EID3 | EP300 interacting inhibitor of differentiation 3 | NM_001008394 | Hs.659857 | 2.5385839 | 0.001927 |
| 11749054_x_at | PXN | paxillin | NM_001080855 | Hs.446336 | 2.532944 | 0.001815 |
| 11725632_at | NR4A2 | nuclear receptor subfamily 4, group A, member 2 | NM_006186 | Hs.563344 | 2.5309027 | 0.005578 |
| 11753670_a_at | AP1S3 | adaptor-related protein complex 1, sigma 3 subunit | NM_001039569 | Hs.632555 | 2.52272 | 0.004984 |
| 11736826_at | DHH | desert hedgehog | NM_021044 | Hs.524382 | 2.5100313 | 0.001892 |
| 11717618_s_at | PXN | paxillin | NM_001080855 | Hs.446336 | 2.4932455 | 0.004242 |
| 11739541_a_at | PIK3R1 | phosphoinositide-3-kinase, regulatory subunit 1 (alpha) | NM_181504 | Hs.132225 | 2.488999 | 0.002024 |
| 11760109_at | TMEM41B | transmembrane protein 41B | NM_001165030 | Hs.594563 | 2.4707622 | 0.007578 |
| 11719837_a_at | LGALS8 | lectin, galactoside-binding, soluble, 8 | NM_006499 | Hs.4082 | 2.4541634 | 0.008563 |
| 11728311_x_at | ERCC1 | excision repair cross-complementing rodent repair deficiency, complementation group 1 (includes overlapping antisense sequence) | NM_001166049 | Hs.435981 | 2.4508711 | 0.001186 |
| 11748670_a_at | PIK3R1 | phosphoinositide-3-kinase, regulatory subunit 1 (alpha) | NM_181504 | Hs.132225 | 2.4502751 | 0.005862 |
| 11741056_a_at | ADORA2B | adenosine A2b receptor | NM_000676 | Hs.167046 | 2.4260002 | 0.000596 |
| 11736017_s_at | PXN | paxillin | NM_001080855 | Hs.446336 | 2.425783 | 0.002282 |
| **Probe Set ID** | **Gene Symbol** | **Description** | **Genbank Accession ID** | **UniGeneID** | **Fold Change** | **p-value** |
| 11726611_x_at | MAFF | v-maf musculoaponeurotic fibrosarcoma oncogene homolog F (avian) | NM_001161572 | Hs.517617 | 2.4116124 | 0.003076 |
| 11754631_x_at | PIK3R1 | phosphoinositide-3-kinase, regulatory subunit 1 (alpha) | NM_181504 | Hs.132225 | 2.3986839 | 0.005613 |
| 11739539_a_at | PIK3R1 | phosphoinositide-3-kinase, regulatory subunit 1 (alpha) | NM_181504 | Hs.132225 | 2.3934575 | 0.002959 |
| 11731026_a_at | CREM | cAMP responsive element modulator | NM_001881 | Hs.200250 | 2.3839065 | 0.001158 |
| 11726381_a_at | TMEM41B | transmembrane protein 41B | NM_001165030 | Hs.594563 | 2.3605052 | 0.000467 |
| 11764156_s_at | TMEM41B | transmembrane protein 41B | NM_001165030 | Hs.644671 | 2.3519371 | 0.001740 |
| 11719830_a_at | ERCC1 | excision repair cross-complementing rodent repair deficiency, complementation group 1 (includes overlapping antisense sequence) | NM_001166049 | Hs.435981 | 2.347814 | 0.000184 |
| 11717909_at | IGFBP6 | insulin-like growth factor binding protein 6 | NM_002178 | Hs.274313 | 2.3440329 | 0.000173 |
| 11739540_a_at | PIK3R1 | phosphoinositide-3-kinase, regulatory subunit 1 (alpha) | NM_181504 | Hs.132225 | 2.3184941 | 0.006354 |
| 11725631_a_at | NR4A2 | nuclear receptor subfamily 4, group A, member 2 | NM_006186 | Hs.563344 | 2.3060244 | 0.005190 |
| 11725213_at | METTL7B | methyltransferase like 7B | NM_152637 | Hs.51483 | 2.2919061 | 0.005093 |
| 11747399_x_at | PLAT | plasminogen activator, tissue | NM_000930 | Hs.491582 | 2.2768194 | 0.001463 |
| 11724478_s_at | FOSL1 | FOS-like antigen 1 | NM_005438 | Hs.283565 | 2.2649791 | 0.008611 |
| 11731183_a_at | TFPI | tissue factor pathway inhibitor (lipoprotein-associated coagulation inhibitor) | NM_001032281 | Hs.516578 | 2.2484469 | 0.002473 |
| 11732196_x_at | KPNA4 | karyopherin alpha 4 (importin alpha 3) | NM_002268 | Hs.715552 | 2.2482202 | 0.003249 |
| 11733019_a_at | PIK3R1 | phosphoinositide-3-kinase, regulatory subunit 1 (alpha) | NM_181504 | Hs.132225 | 2.2314135 | 0.002956 |
| 11719490_a_at | TMEM189 | transmembrane protein 189 | NM_001162505 | Hs.420529 | 2.2205564 | 0.007766 |
| 11715359_a_at | TIMP1 | TIMP metallopeptidase inhibitor 1 | NM_003254 | Hs.522632 | 2.2114531 | 0.000176 |
| 11759435_at | HECTD2 | HECT domain containing 2 | NM_173497 | Hs.596096 | 2.2067317 | 0.001476 |
| 11740030_s_at | CREM | cAMP responsive element modulator | NM_001881 | Hs.200250 | 2.2004529 | 0.001844 |
| 11742840_x_at | HSD17B1 | hydroxysteroid (17-beta) dehydrogenase 1 | NM_000413 | Hs.654385 | 2.1994885 | 0.000433 |
| 11715360_x_at | TIMP1 | TIMP metallopeptidase inhibitor 1 | NM_003254 | Hs.522632 | 2.1935014 | 0.002051 |
| 11758522_s_at | CREM | cAMP responsive element modulator | NM_001881 | Hs.600170 | 2.1863293 | 0.000060 |
| 11729574_at | ENC1 | ectodermal-neural cortex 1 (with BTB-like domain) | NM_003633 | Hs.104925 | 2.1690899 | 0.001091 |
| 11731027_s_at | CREM | cAMP responsive element modulator | NM_001881 | Hs.200250 | 2.1667293 | 0.001698 |
| 11724479_x_at | FOSL1 | FOS-like antigen 1 | NM_005438 | Hs.283565 | 2.1581908 | 0.004082 |
| 11750408_a_at | CD97 | CD97 molecule | NM_001025160 | Hs.466039 | 2.1575408 | 0.000734 |
| 11747398_a_at | PLAT | plasminogen activator, tissue | NM_000930 | Hs.491582 | 2.1550741 | 0.002513 |
| 11723448_x_at | MALL | mal, T-cell differentiation protein-like | NM_005434 | Hs.185055 | 2.1427141 | 0.001195 |
| 11745756_a_at | TMEM41B | transmembrane protein 41B | NM_001165030 | Hs.594563 | 2.1384316 | 0.000386 |
| 11756746_s_at | C11orf17 /// NUAK2 | chromosome 11 open reading frame 17 /// NUAK family, SNF1-like kinase, 2 | NM_020642 | Hs.497512 | 2.1342916 | 0.004802 |
| 11758119_s_at | TMEM41B | transmembrane protein 41B | NM_001165030 | Hs.594413 | 2.1337442 | 0.000776 |
| 11749948_x_at | HSD17B1 | hydroxysteroid (17-beta) dehydrogenase 1 | NM_000413 | Hs.654385 | 2.1328447 | 0.000873 |
| **Probe Set ID** | **Gene Symbol** | **Description** | **Genbank Accession ID** | **UniGeneID** | **Fold Change** | **p-value** |
| 11754712_a_at | TBC1D10A | TBC1 domain family, member 10A | NM_031937 | Hs.655273 | 2.1242569 | 0.000803 |
| 11715673_x_at | JUNB | jun B proto-oncogene | NM_002229 | Hs.25292 | 2.1193947 | 0.001998 |
| 11756581_s_at | PRSS23 | protease, serine, 23 | NM_007173 | Hs.25338 | 2.1144378 | 0.000184 |
| 11753829_a_at | PLAT | plasminogen activator, tissue | NM_000930 | Hs.491582 | 2.1132147 | 0.008493 |
| 11723447_at | MALL | mal, T-cell differentiation protein-like | NM_005434 | Hs.185055 | 2.097317 | 0.001915 |
| 11747474_a_at | NR4A2 | nuclear receptor subfamily 4, group A, member 2 | NM_006186 | Hs.563344 | 2.07545 | 0.007851 |
| 11755308_x_at | TMEM189 | transmembrane protein 189 | NM_001162505 | Hs.420529 | 2.0605063 | 0.001220 |
| 11724932_at | CREM | cAMP responsive element modulator | NM_001881 | Hs.200250 | 2.0507902 | 0.007460 |
| 11754327_x_at | TBC1D10A | TBC1 domain family, member 10A | NM_031937 | Hs.655273 | 2.0458359 | 0.000371 |
| 11719842_x_at | PHLDA3 | pleckstrin homology-like domain, family A, member 3 | NM_012396 | Hs.268557 | 2.0356156 | 0.003364 |
| 11749852_s_at | FOS | FBJ murine osteosarcoma viral oncogene homolog | NM_005252 | Hs.707896 | 2.0267761 | 0.000560 |
| 11732195_at | KPNA4 | karyopherin alpha 4 (importin alpha 3) | NM_002268 | Hs.715552 | 2.013474 | 0.003401 |
| 11732194_s_at | KPNA4 | karyopherin alpha 4 (importin alpha 3) | NM_002268 | Hs.715552 | 2.0075586 | 0.000502 |

Supplementary Table S4. Down regulated genes in (AZD4547+aFGF)-treated AN3-CA cells compared with the (DMSO+aFGF)-treated cells (18 h)

| **Probe Set ID** | **Gene Symbol** | **Description** | **Genbank**  **AccessionID** | **UniGeneID** | **Fold Change** | **p-value** |
| --- | --- | --- | --- | --- | --- | --- |
| 11717566_at | EMP1 | epithelial membrane protein 1 | NM_001423 | Hs.707901 | 0.0107908 | 0.000067 |
| 11717565_s_at | EMP1 | epithelial membrane protein 1 | NM_001423 | Hs.707901 | 0.0175112 | 0.000445 |
| 11717860_a_at | EGR1 | early growth response 1 | NM_001964 | Hs.326035 | 0.0189804 | 0.000058 |
| 11752940_a_at | EGR1 | early growth response 1 | NM_001964 | Hs.326035 | 0.0221187 | 0.001007 |
| 11721307_at | PHLDA1 | pleckstrin homology-like domain, family A, member 1 | NM_007350 | Hs.602085 | 0.0261064 | 0.000229 |
| 11717564_a_at | EMP1 | epithelial membrane protein 1 | NM_001423 | Hs.707901 | 0.0269149 | 0.000328 |
| 11754334_s_at | EGR1 | early growth response 1 | NM_001964 | Hs.708393 | 0.0269165 | 0.000051 |
| 11721305_a_at | PHLDA1 | pleckstrin homology-like domain, family A, member 1 | NM_007350 | Hs.602085 | 0.0304883 | 0.000235 |
| 11717862_x_at | EGR1 | early growth response 1 | NM_001964 | Hs.326035 | 0.0340829 | 0.000177 |
| 11757312_x_at | SERPINE1 | serpin peptidase inhibitor, clade E (nexin, plasminogen activator inhibitor type 1), member 1 | NM_000602 | Hs.713079 | 0.0372704 | 0.000427 |
| 11720027_x_at | VGF | VGF nerve growth factor inducible | NM_003378 | Hs.718797 | 0.0385735 | 0.000133 |
| 11746856_a_at | SERPINE1 | serpin peptidase inhibitor, clade E (nexin, plasminogen activator inhibitor type 1), member 1 | NM_000602 | Hs.414795 | 0.0426654 | 0.000184 |
| 11720026_a_at | VGF | VGF nerve growth factor inducible | NM_003378 | Hs.718797 | 0.0475734 | 0.000196 |
| 11716665_s_at | GDF15 | growth differentiation factor 15 | NM_004864 | Hs.616962 | 0.0521358 | 0.000503 |
| 11717861_a_at | EGR1 | early growth response 1 | NM_001964 | Hs.326035 | 0.0643673 | 0.000419 |
| 11716663_a_at | GDF15 | growth differentiation factor 15 | NM_004864 | Hs.616962 | 0.065856 | 0.000084 |
| 11758619_s_at | LIF | leukemia inhibitory factor (cholinergic differentiation factor) | NM_002309 | Hs.605598 | 0.0718539 | 0.000186 |
| 11715636_a_at | SERPINE1 | serpin peptidase inhibitor, clade E (nexin, plasminogen activator inhibitor type 1), member 1 | NM_000602 | Hs.414795 | 0.0745117 | 0.000147 |
| 11716664_x_at | GDF15 | growth differentiation factor 15 | NM_004864 | Hs.616962 | 0.0790029 | 0.000737 |
| 11728413_at | SERPINB8 | serpin peptidase inhibitor, clade B (ovalbumin), member 8 | NM_001031848 | Hs.368077 | 0.0946793 | 0.000663 |
| 11726498_at | LIF | leukemia inhibitory factor (cholinergic differentiation factor) | NM_002309 | Hs.2250 | 0.1132165 | 0.003902 |
| 11729128_at | CPA4 | carboxypeptidase A4 | NM_001163446 | Hs.93764 | 0.1137757 | 0.002163 |
| 11737922_a_at | SERPINB8 | serpin peptidase inhibitor, clade B (ovalbumin), member 8 | NM_001031848 | Hs.368077 | 0.1250884 | 0.000079 |
| 11751643_x_at | EGR1 | early growth response 1 | NM_001964 | Hs.326035 | 0.1275091 | 0.003954 |
| 11734659_a_at | FOS | FBJ murine osteosarcoma viral oncogene homolog | NM_005252 | Hs.707896 | 0.1283947 | 0.000979 |
| 11726497_at | LIF | leukemia inhibitory factor (cholinergic differentiation factor) | NM_002309 | Hs.2250 | 0.1313758 | 0.007642 |
| 11745020_a_at | TNFRSF12A | tumor necrosis factor receptor superfamily, member 12A | NM_016639 | Hs.355899 | 0.1329158 | 0.000003 |
| 11749291_a_at | FOS | FBJ murine osteosarcoma viral oncogene homolog | NM_005252 | Hs.707896 | 0.1370703 | 0.000212 |
| **Probe Set ID** | **Gene Symbol** | **Description** | **Genbank**  **AccessionID** | **UniGeneID** | **Fold Change** | **p-value** |
| 11748180_a_at | SERPINB8 | serpin peptidase inhibitor, clade B (ovalbumin), member 8 | NM_001031848 | Hs.368077 | 0.1373381 | 0.000423 |
| 11725767_at | CLCF1 | cardiotrophin-like cytokine factor 1 | NM_001166212 | Hs.502977 | 0.1374523 | 0.001334 |
| 11718779_at | S100A2 | S100 calcium binding protein A2 | NM_005978 | Hs.516484 | 0.1394668 | 0.002102 |
| 11722728_a_at | EGR2 | early growth response 2 | NM_000399 | Hs.1395 | 0.1413174 | 0.008474 |
| 11721308_at | PHLDA1 | pleckstrin homology-like domain, family A, member 1 | NM_007350 | Hs.602085 | 0.144564 | 0.003664 |
| 11721911_at | SOX8 | SRY (sex determining region Y)-box 8 | NM_014587 | Hs.243678 | 0.1591956 | 0.000248 |
| 11721306_at | PHLDA1 | pleckstrin homology-like domain, family A, member 1 | NM_007350 | Hs.602085 | 0.1715081 | 0.002414 |
| 11724902_a_at | MAP3K14 | mitogen-activated protein kinase kinase kinase 14 | NM_003954 | Hs.404183 | 0.1994628 | 0.003236 |
| 11745021_a_at | MYC | v-myc myelocytomatosis viral oncogene homolog (avian) | NM_002467 | Hs.202453 | 0.2025044 | 0.000240 |
| 11744953_a_at | ANXA1 | annexin A1 | NM_000700 | Hs.494173 | 0.2046344 | 0.000568 |
| 11724478_s_at | FOSL1 | FOS-like antigen 1 | NM_005438 | Hs.283565 | 0.2064903 | 0.000360 |
| 11725809_at | ARC | activity-regulated cytoskeleton-associated protein | NM_015193 | Hs.40888 | 0.2067512 | 0.000342 |
| 11744955_a_at | ANXA1 | annexin A1 | NM_000700 | Hs.494173 | 0.2082629 | 0.000899 |
| 11743682_s_at | KLF10 | Kruppel-like factor 10 | NM_001032282 | Hs.435001 | 0.2134189 | 0.001507 |
| 11721092_a_at | THBS1 | thrombospondin 1 | NM_003246 | Hs.164226 | 0.2165251 | 0.003057 |
| 11747820_x_at | UPP1 | uridine phosphorylase 1 | NM_003364 | Hs.488240 | 0.2201641 | 0.000834 |
| 11744954_x_at | ANXA1 | annexin A1 | NM_000700 | Hs.494173 | 0.2209545 | 0.001217 |
| 11729129_a_at | CPA4 | carboxypeptidase A4 | NM_001163446 | Hs.93764 | 0.2214871 | 0.009563 |
| 11717514_a_at | ANXA1 | annexin A1 | NM_000700 | Hs.494173 | 0.2220426 | 0.003098 |
| 11733068_s_at | KLF10 | Kruppel-like factor 10 | NM_001032282 | Hs.435001 | 0.2220723 | 0.003586 |
| 11722503_at | ITGB8 | integrin, beta 8 | NM_002214 | Hs.592171 | 0.2324536 | 0.002203 |
| 11721093_a_at | THBS1 | thrombospondin 1 | NM_003246 | Hs.164226 | 0.2368054 | 0.005246 |
| 11718394_at | JUN | jun proto-oncogene | NM_002228 | Hs.714791 | 0.2385206 | 0.002583 |
| 11718395_s_at | JUN | jun proto-oncogene | NM_002228 | Hs.714791 | 0.2435854 | 0.008988 |
| 11741056_a_at | ADORA2B | adenosine A2b receptor | NM_000676 | Hs.167046 | 0.2500232 | 0.001114 |
| 11749378_a_at | CLCF1 | cardiotrophin-like cytokine factor 1 | NM_001166212 | Hs.502977 | 0.2554483 | 0.005154 |
| 11718631_at | SERTAD1 | SERTA domain containing 1 | NM_013376 | Hs.269898 | 0.2588986 | 0.000830 |
| 11757721_s_at | CSRNP1 | cysteine-serine-rich nuclear protein 1 | NM_033027 | Hs.593170 | 0.2613432 | 0.003210 |
| 11715493_a_at | CYR61 | cysteine-rich, angiogenic inducer, 61 | NM_001554 | Hs.8867 | 0.2638029 | 0.004915 |
| 11729821_at | IL27RA | interleukin 27 receptor, alpha | NM_004843 | Hs.132781 | 0.2638778 | 0.006714 |
| 11725983_at | BHLHE40 | basic helix-loop-helix family, member e40 | NM_003670 | Hs.719093 | 0.266576 | 0.007237 |
| 11719840_at | PHLDA3 | pleckstrin homology-like domain, family A, member 3 | NM_012396 | Hs.268557 | 0.267431 | 0.000760 |
| 11748775_a_at | UPP1 | uridine phosphorylase 1 | NM_003364 | Hs.488240 | 0.2709467 | 0.000173 |
| **Probe Set ID** | **Gene Symbol** | **Description** | **Genbank**  **AccessionID** | **UniGeneID** | **Fold Change** | **p-value** |
| 11719842_x_at | PHLDA3 | pleckstrin homology-like domain, family A, member 3 | NM_012396 | Hs.268557 | 0.2739061 | 0.000009 |
| 11759482_at | WWTR1 | WW domain containing transcription regulator 1 | NM_001168278 | Hs.719249 | 0.2745348 | 0.003004 |
| 11716048_at | TRIB1 | tribbles homolog 1 (Drosophila) | NM_025195 | Hs.444947 | 0.2784224 | 0.000084 |
| 11754545_x_at | PLAT | plasminogen activator, tissue | NM_000930 | Hs.491582 | 0.2809588 | 0.000458 |
| 11725213_at | METTL7B | methyltransferase like 7B | NM_152637 | Hs.51483 | 0.2841131 | 0.001702 |
| 11721090_at | THBS1 | thrombospondin 1 | NM_003246 | Hs.164226 | 0.2869164 | 0.000787 |
| 11723448_x_at | MALL | mal, T-cell differentiation protein-like | NM_005434 | Hs.185055 | 0.2874488 | 0.004550 |
| 11749809_a_at | PLAT | plasminogen activator, tissue | NM_000930 | Hs.491582 | 0.2903478 | 0.000161 |
| 11719835_a_at | LGALS8 | lectin, galactoside-binding, soluble, 8 | NM_006499 | Hs.4082 | 0.2908279 | 0.002212 |
| 11755099_a_at | WWTR1 | WW domain containing transcription regulator 1 | NM_001168278 | Hs.719249 | 0.295766 | 0.007041 |
| 11726784_a_at | LRFN5 | leucine rich repeat and fibronectin type III domain containing 5 | NM_152447 | Hs.715685 | 0.296211 | 0.001766 |
| 11759483_at | WWTR1 | WW domain containing transcription regulator 1 | NM_001168278 | Hs.719249 | 0.2967805 | 0.001396 |
| 11748131_a_at | LGALS8 | lectin, galactoside-binding, soluble, 8 | NM_006499 | Hs.4082 | 0.2973665 | 0.001747 |
| 11749905_a_at | CYR61 | cysteine-rich, angiogenic inducer, 61 | NM_001554 | Hs.8867 | 0.2978067 | 0.002346 |
| 11720618_s_at | TRIM9 | tripartite motif-containing 9 | NM_015163 | Hs.654750 | 0.2982854 | 0.000036 |
| 11725382_a_at | RAPGEF3 | Rap guanine nucleotide exchange factor (GEF) 3 | NM_001098531 | Hs.8578 | 0.300194 | 0.007181 |
| 11731896_a_at | TNFSF4 | tumor necrosis factor (ligand) superfamily, member 4 | NM_003326 | Hs.181097 | 0.3010594 | 0.002590 |
| 11720062_s_at | IER3 | immediate early response 3 | NM_003897 | Hs.591785 | 0.3042836 | 0.000024 |
| 11732321_a_at | PLAT | plasminogen activator, tissue | NM_000930 | Hs.491582 | 0.3046718 | 0.002403 |
| 11753670_a_at | AP1S3 | adaptor-related protein complex 1, sigma 3 subunit | NM_001039569 | Hs.632555 | 0.310594 | 0.002661 |
| 11726298_s_at | LGALS8 | lectin, galactoside-binding, soluble, 8 | NM_006499 | Hs.4082 | 0.3120955 | 0.005585 |
| 11724477_a_at | FOSL1 | FOS-like antigen 1 | NM_005438 | Hs.283565 | 0.3141496 | 0.006495 |
| 11726299_x_at | LGALS8 | lectin, galactoside-binding, soluble, 8 | NM_006499 | Hs.4082 | 0.3183885 | 0.001113 |
| 11742840_x_at | HSD17B1 | hydroxysteroid (17-beta) dehydrogenase 1 | NM_000413 | Hs.654385 | 0.3184166 | 0.000125 |
| 11725155_at | FJX1 | four jointed box 1 (Drosophila) | NM_014344 | Hs.39384 | 0.3191063 | 0.000642 |
| 11749103_a_at | ITGB8 | integrin, beta 8 | NM_002214 | Hs.592171 | 0.324443 | 0.004884 |
| 11749948_x_at | HSD17B1 | hydroxysteroid (17-beta) dehydrogenase 1 | NM_000413 | Hs.654385 | 0.3248505 | 0.000127 |
| 11719841_s_at | PHLDA3 | pleckstrin homology-like domain, family A, member 3 | NM_012396 | Hs.268557 | 0.3279554 | 0.000119 |
| 11720617_at | TRIM9 | tripartite motif-containing 9 | NM_015163 | Hs.654750 | 0.3285286 | 0.001302 |
| 11753073_a_at | TNFSF4 | tumor necrosis factor (ligand) superfamily, member 4 | NM_003326 | Hs.181097 | 0.3299514 | 0.004998 |
| 11725606_at | TRIM9 | tripartite motif-containing 9 | NM_015163 | Hs.654750 | 0.3328034 | 0.003014 |
| **Probe Set ID** | **Gene Symbol** | **Description** | **Genbank**  **AccessionID** | **UniGeneID** | **Fold Change** | **p-value** |
| 11721091_a_at | THBS1 | thrombospondin 1 | NM_003246 | Hs.164226 | 0.3340595 | 0.003329 |
| 11760109_at | TMEM41B | transmembrane protein 41B | NM_001165030 | Hs.594563 | 0.3354159 | 0.007438 |
| 11761141_x_at | LGALS8 | lectin, galactoside-binding, soluble, 8 | NM_006499 | Hs.4082 | 0.3368639 | 0.005190 |
| 11760574_x_at | FOSL1 | FOS-like antigen 1 | NM_005438 | Hs.283565 | 0.3370438 | 0.000972 |
| 11720030_a_at | SCG2 | secretogranin II | NM_003469 | Hs.516726 | 0.3377219 | 0.004134 |
| 11736826_at | DHH | desert hedgehog | NM_021044 | Hs.524382 | 0.3385462 | 0.004840 |
| 11715673_x_at | JUNB | jun B proto-oncogene | NM_002229 | Hs.25292 | 0.3385634 | 0.000805 |
| 11722153_s_at | SGMS2 | sphingomyelin synthase 2 | NM_001136257 | Hs.595423 | 0.3390737 | 0.003656 |
| 11751568_a_at | HSD17B1 | Hydroxysteroid (17-beta) dehydrogenase 1 | NM_000413 | Hs.654385 | 0.3412356 | 0.001397 |
| 11758050_s_at | RGS3 | regulator of G-protein signaling 3 | NM_017790 | Hs.693972 | 0.346062 | 0.000213 |
| 11747399_x_at | PLAT | plasminogen activator, tissue | NM_000930 | Hs.491582 | 0.3465882 | 0.002219 |
| 11719836_x_at | LGALS8 | lectin, galactoside-binding, soluble, 8 | NM_006499 | Hs.4082 | 0.3470698 | 0.005663 |
| 11750154_a_at | RGS3 | regulator of G-protein signaling 3 | NM_017790 | Hs.494875 | 0.3494248 | 0.004120 |
| 11725632_at | NR4A2 | nuclear receptor subfamily 4, group A, member 2 | NM_006186 | Hs.563344 | 0.3507888 | 0.005289 |
| 11727363_a_at | SHC1 | SHC (Src homology 2 domain containing) transforming protein 1 | NM_001130040 | Hs.433795 | 0.3578815 | 0.000865 |
| 11740780_at | FOXD2 | forkhead box D2 | NM_004474 | Hs.166188 | 0.3581126 | 0.003469 |
| 11726611_x_at | MAFF | v-maf musculoaponeurotic fibrosarcoma oncogene homolog F (avian) | NM_001161572 | Hs.517617 | 0.3623666 | 0.003305 |
| 11764156_s_at | TMEM41B | transmembrane protein 41B | NM_001165030 | Hs.644671 | 0.362975 | 0.008517 |
| 11731026_a_at | CREM | cAMP responsive element modulator | NM_001881 | Hs.200250 | 0.3666487 | 0.007004 |
| 11719837_a_at | LGALS8 | lectin, galactoside-binding, soluble, 8 | NM_006499 | Hs.4082 | 0.3703901 | 0.000455 |
| 11751671_a_at | LGALS8 | lectin, galactoside-binding, soluble, 8 | NM_006499 | Hs.4082 | 0.374726 | 0.001164 |
| 11748670_a_at | PIK3R1 | phosphoinositide-3-kinase, regulatory subunit 1 (alpha) | NM_181504 | Hs.132225 | 0.3766981 | 0.000390 |
| 11732196_x_at | KPNA4 | karyopherin alpha 4 (importin alpha 3) | NM_002268 | Hs.715552 | 0.3803422 | 0.005025 |
| 11726381_a_at | TMEM41B | transmembrane protein 41B | NM_001165030 | Hs.594563 | 0.3846921 | 0.002772 |
| 11741960_a_at | ADAM9 | ADAM metallopeptidase domain 9 | NM_003816 | Hs.591852 | 0.3849336 | 0.004317 |
| 11728311_x_at | ERCC1 | excision repair cross-complementing rodent repair deficiency, complementation group 1 (includes overlapping antisense sequence) | NM_001166049 | Hs.435981 | 0.3858695 | 0.000659 |
| 11715359_a_at | TIMP1 | TIMP metallopeptidase inhibitor 1 | NM_003254 | Hs.522632 | 0.3875354 | 0.001831 |
| 11749852_s_at | FOS | FBJ murine osteosarcoma viral oncogene homolog | NM_005252 | Hs.707896 | 0.387787 | 0.006660 |
| 11751672_x_at | LGALS8 | lectin, galactoside-binding, soluble, 8 | NM_006499 | Hs.4082 | 0.3883314 | 0.001279 |
| 11747540_a_at | ADAM9 | ADAM metallopeptidase domain 9 | NM_003816 | Hs.591852 | 0.390042 | 0.000224 |
| **Probe Set ID** | **Gene Symbol** | **Description** | **Genbank**  **AccessionID** | **UniGeneID** | **Fold Change** | **p-value** |
| 11758119_s_at | TMEM41B | transmembrane protein 41B | NM_001165030 | Hs.594413 | 0.3936264 | 0.000394 |
| 11747398_a_at | PLAT | plasminogen activator, tissue | NM_000930 | Hs.491582 | 0.3941483 | 0.000885 |
| 11734245_at | ICAM5 | intercellular adhesion molecule 5, telencephalin | NM_003259 | Hs.465862 | 0.3973022 | 0.003042 |
| 11731027_s_at | CREM | cAMP responsive element modulator | NM_001881 | Hs.200250 | 0.3983281 | 0.000975 |
| 11739061_at | SLC7A5 | solute carrier family 7 (cationic amino acid transporter, y+ system), member 5 | NM_003486 | Hs.513797 | 0.4001026 | 0.001643 |
| 11757147_s_at | C7orf40 /// SNORA9 | chromosome 7 open reading frame 40 /// small nucleolar RNA, H/ACA box 9 | NR_002952 | Hs.712034 | 0.4005198 | 0.004107 |
| 11739541_a_at | PIK3R1 | phosphoinositide-3-kinase, regulatory subunit 1 (alpha) | NM_181504 | Hs.132225 | 0.400536 | 0.005231 |
| 11757442_a_at | SERPINE2 | serpin peptidase inhibitor, clade E (nexin, plasminogen activator inhibitor type 1), member 2 | NM_001136528 | Hs.38449 | 0.4017786 | 0.003013 |
| 11715360_x_at | TIMP1 | TIMP metallopeptidase inhibitor 1 | NM_003254 | Hs.522632 | 0.401868 | 0.000573 |
| 11741079_x_at | CREM | cAMP responsive element modulator | NM_001881 | Hs.200250 | 0.402473 | 0.001756 |
| 11740030_s_at | CREM | cAMP responsive element modulator | NM_001881 | Hs.200250 | 0.4055091 | 0.001618 |
| 11754631_x_at | PIK3R1 | phosphoinositide-3-kinase, regulatory subunit 1 (alpha) | NM_181504 | Hs.132225 | 0.4056718 | 0.008799 |
| 11739540_a_at | PIK3R1 | phosphoinositide-3-kinase, regulatory subunit 1 (alpha) | NM_181504 | Hs.132225 | 0.4064122 | 0.008310 |
| 11739469_at | TMEM87B | transmembrane protein 87B | NM_032824 | Hs.656298 | 0.407084 | 0.000157 |
| 11721543_a_at | CSRNP1 | cysteine-serine-rich nuclear protein 1 | NM_033027 | Hs.370950 | 0.4073521 | 0.004714 |
| 11752828_x_at | PXN | paxillin | NM_001080855 | Hs.446336 | 0.4090211 | 0.001483 |
| 11729574_at | ENC1 | ectodermal-neural cortex 1 (with BTB-like domain) | NM_003633 | Hs.104925 | 0.411048 | 0.000847 |
| 11719830_a_at | ERCC1 | excision repair cross-complementing rodent repair deficiency, complementation group 1 (includes overlapping antisense sequence) | NM_001166049 | Hs.435981 | 0.4120904 | 0.000259 |
| 11740029_x_at | CREM | cAMP responsive element modulator | NM_001881 | Hs.200250 | 0.4130692 | 0.003798 |
| 11724454_at | SLC22A4 | solute carrier family 22 (organic cation/ergothioneine transporter), member 4 | NM_003059 | Hs.310591 | 0.4149428 | 0.003801 |
| 11727364_s_at | SHC1 | SHC (Src homology 2 domain containing) transforming protein 1 | NM_001130040 | Hs.433795 | 0.4155259 | 0.001878 |
| 11720049_a_at | GBE1 | glucan (1,4-alpha-), branching enzyme 1 | NM_000158 | Hs.436062 | 0.4157938 | 0.001586 |
| 11717718_at | FNDC3B | fibronectin type III domain containing 3B | NM_001135095 | Hs.159430 | 0.4160334 | 0.000198 |
| 11717617_a_at | PXN | paxillin | NM_001080855 | Hs.446336 | 0.4167084 | 0.000134 |
| 11733018_s_at | PIK3R1 | phosphoinositide-3-kinase, regulatory subunit 1 (alpha) | NM_181504 | Hs.132225 | 0.4178746 | 0.001304 |
| **Probe Set ID** | **Gene Symbol** | **Description** | **Genbank**  **AccessionID** | **UniGeneID** | **Fold Change** | **p-value** |
| 11732136_a_at | SHC1 | SHC (Src homology 2 domain containing) transforming protein 1 | NM_001130040 | Hs.433795 | 0.41863 | 0.003644 |
| 11734049_a_at | SEH1L | SEH1-like (S. cerevisiae) | NM_001013437 | Hs.301048 | 0.4186835 | 0.000048 |
| 11717909_at | IGFBP6 | insulin-like growth factor binding protein 6 | NM_002178 | Hs.274313 | 0.4195404 | 0.000407 |
| 11740518_a_at | LGALS8 | lectin, galactoside-binding, soluble, 8 | NM_006499 | Hs.4082 | 0.4195957 | 0.000689 |
| 11758522_s_at | CREM | cAMP responsive element modulator | NM_001881 | Hs.600170 | 0.4202521 | 0.001766 |
| 11756746_s_at | C11orf17 /// NUAK2 | chromosome 11 open reading frame 17 /// NUAK family, SNF1-like kinase, 2 | NM_020642 | Hs.497512 | 0.4208988 | 0.000972 |
| 11743609_a_at | FAM3C | family with sequence similarity 3, member C | NM_001040020 | Hs.434053 | 0.4209925 | 0.008899 |
| 11718688_a_at | NES | nestin | NM_006617 | Hs.527971 | 0.4217414 | 0.000327 |
| 11720986_at | YRDC | yrdC domain containing (E. coli) | NM_024640 | Hs.301564 | 0.4222986 | 0.000195 |
| 11739539_a_at | PIK3R1 | phosphoinositide-3-kinase, regulatory subunit 1 (alpha) | NM_181504 | Hs.132225 | 0.4225614 | 0.009115 |
| 11740028_a_at | CREM | cAMP responsive element modulator | NM_001881 | Hs.200250 | 0.4230782 | 0.000176 |
| 11736018_x_at | PXN | paxillin | NM_001080855 | Hs.446336 | 0.4241059 | 0.003380 |
| 11716950_s_at | SRXN1 | sulfiredoxin 1 | NM_080725 | Hs.516830 | 0.4251012 | 0.001282 |
| 11739470_at | TMEM87B | transmembrane protein 87B | NM_032824 | Hs.656298 | 0.4258436 | 0.003565 |
| 11731183_a_at | TFPI | tissue factor pathway inhibitor (lipoprotein-associated coagulation inhibitor) | NM_001032281 | Hs.516578 | 0.4283519 | 0.006127 |
| 11727623_at | EID3 | EP300 interacting inhibitor of differentiation 3 | NM_001008394 | Hs.659857 | 0.4286343 | 0.001927 |
| 11756649_a_at | SEH1L | SEH1-like (S. cerevisiae) | NM_001013437 | Hs.301048 | 0.4287919 | 0.000986 |
| 11758297_s_at | SHC1 | SHC (Src homology 2 domain containing) transforming protein 1 | NM_001130040 | Hs.707862 | 0.428829 | 0.000154 |
| 11749054_x_at | PXN | paxillin | NM_001080855 | Hs.446336 | 0.429868 | 0.000385 |
| 11753764_s_at | TNFRSF21 | tumor necrosis factor receptor superfamily, member 21 | NM_014452 | Hs.443577 | 0.4314126 | 0.002688 |
| 11717715_at | FNDC3B | fibronectin type III domain containing 3B | NM_001135095 | Hs.159430 | 0.4369602 | 0.000269 |
| 11747474_a_at | NR4A2 | nuclear receptor subfamily 4, group A, member 2 | NM_006186 | Hs.563344 | 0.4383484 | 0.002218 |
| 11750408_a_at | CD97 | CD97 molecule | NM_001025160 | Hs.466039 | 0.4395327 | 0.001346 |
| 11724932_at | CREM | cAMP responsive element modulator | NM_001881 | Hs.200250 | 0.4400258 | 0.000367 |
| 11743608_s_at | FAM3C | family with sequence similarity 3, member C | NM_001040020 | Hs.434053 | 0.440951 | 0.006343 |
| 11758043_s_at | IER2 | immediate early response 2 | NM_004907 | Hs.493396 | 0.4412104 | 0.000273 |
| 11753829_a_at | PLAT | plasminogen activator, tissue | NM_000930 | Hs.491582 | 0.4413687 | 0.005444 |
| 11725367_at | IER5L | immediate early response 5-like | NM_203434 | Hs.529857 | 0.4431985 | 0.004210 |
| 11722413_a_at | SLC7A1 | solute carrier family 7 (cationic amino acid transporter, y+ system), member 1 | NM_003045 | Hs.14846 | 0.4448083 | 0.004034 |
| **Probe Set ID** | **Gene Symbol** | **Description** | **Genbank**  **AccessionID** | **UniGeneID** | **Fold Change** | **p-value** |
| 11748606_x_at | POLR1B | polymerase (RNA) I polypeptide B, 128kDa | NM_001137604 | Hs.86337 | 0.4452253 | 0.001373 |
| 11759435_at | HECTD2 | HECT domain containing 2 | NM_173497 | Hs.596096 | 0.4464612 | 0.000615 |
| 11755797_x_at | ADAM9 | ADAM metallopeptidase domain 9 | NM_003816 | Hs.591852 | 0.447265 | 0.000213 |
| 11725365_at | IER5L | immediate early response 5-like | NM_203434 | Hs.529857 | 0.4475357 | 0.001044 |
| 11718680_a_at | CD97 | CD97 molecule | NM_001025160 | Hs.466039 | 0.4495952 | 0.000991 |
| 11725393_s_at | MAK16 | MAK16 homolog (S. cerevisiae) | NM_032509 | Hs.583805 | 0.4497824 | 0.000334 |
| 11733019_a_at | PIK3R1 | phosphoinositide-3-kinase, regulatory subunit 1 (alpha) | NM_181504 | Hs.132225 | 0.4514481 | 0.003570 |
| 11723310_at | TNFRSF10D | tumor necrosis factor receptor superfamily, member 10d, decoy with truncated death domain | NM_003840 | Hs.213467 | 0.455872 | 0.007576 |
| 11715301_s_at | NOP16 | NOP16 nucleolar protein homolog (yeast) | NM_016391 | Hs.696283 | 0.4576221 | 0.009990 |
| 11719490_a_at | TMEM189 | transmembrane protein 189 | NM_001162505 | Hs.420529 | 0.4582021 | 0.002056 |
| 11716551_s_at | HES1 | hairy and enhancer of split 1, (Drosophila) | NM_005524 | Hs.250666 | 0.4589639 | 0.005550 |
| 11719321_a_at | DNALI1 | dynein, axonemal, light intermediate chain 1 | NM_003462 | Hs.406050 | 0.4592334 | 0.007723 |
| 11758780_a_at | NOP16 | NOP16 nucleolar protein homolog (yeast) | NM_016391 | Hs.696283 | 0.4603803 | 0.000248 |
| 11748605_a_at | POLR1B | polymerase (RNA) I polypeptide B, 128kDa | NM_001137604 | Hs.86337 | 0.4614733 | 0.001528 |
| 11723876_at | KCNK5 | potassium channel, subfamily K, member 5 | NM_003740 | Hs.444448 | 0.463917 | 0.001821 |
| 11748128_a_at | SLC25A32 | solute carrier family 25, member 32 | NM_030780 | Hs.607819 | 0.4644288 | 0.003200 |
| 11720985_at | YRDC | yrdC domain containing (E. coli) | NM_024640 | Hs.301564 | 0.4659921 | 0.007526 |
| 11725392_a_at | MAK16 | MAK16 homolog (S. cerevisiae) | NM_032509 | Hs.583805 | 0.4663179 | 0.002365 |
| 11717618_s_at | PXN | paxillin | NM_001080855 | Hs.446336 | 0.4679811 | 0.002404 |
| 11742723_a_at | STAT6 | signal transducer and activator of transcription 6, interleukin-4 induced | NM_001178078 | Hs.524518 | 0.46844 | 0.008875 |
| 11756456_a_at | C10orf2 | chromosome 10 open reading frame 2 | NM_001163812 | Hs.22678 | 0.4704126 | 0.001676 |
| 11749256_a_at | RRP1 | ribosomal RNA processing 1 homolog (S. cerevisiae) | NM_003683 | Hs.110757 | 0.4708476 | 0.002789 |
| 11722155_a_at | SGMS2 | sphingomyelin synthase 2 | NM_001136257 | Hs.595423 | 0.470938 | 0.000497 |
| 11719019_at | CBFB | core-binding factor, beta subunit | NM_001755 | Hs.460988 | 0.4726583 | 0.001967 |
| 11750740_a_at | ST3GAL5 | ST3 beta-galactoside alpha-2,3-sialyltransferase 5 | NM_001042437 | Hs.415117 | 0.4728368 | 0.001943 |
| 11724275_s_at | TMEM158 | transmembrane protein 158 (gene/pseudogene) | NM_015444 | Hs.716411 | 0.474534 | 0.001856 |
| 11736017_s_at | PXN | paxillin | NM_001080855 | Hs.446336 | 0.475155 | 0.001227 |
| 11724931_a_at | MERTK | c-mer proto-oncogene tyrosine kinase | NM_006343 | Hs.306178 | 0.4752832 | 0.004265 |
| 11749380_a_at | WDR74 | WD repeat domain 74 | NM_018093 | Hs.655372 | 0.4759189 | 0.000591 |
| 11716550_at | HES1 | hairy and enhancer of split 1, (Drosophila) | NM_005524 | Hs.250666 | 0.4762782 | 0.001165 |
| **Probe Set ID** | **Gene Symbol** | **Description** | **Genbank**  **AccessionID** | **UniGeneID** | **Fold Change** | **p-value** |
| 11751627_a_at | KDSR | 3-ketodihydrosphingosine reductase | NM_002035 | Hs.74050 | 0.4765625 | 0.001614 |
| 11742232_s_at | FAM3C | family with sequence similarity 3, member C | NM_001040020 | Hs.434053 | 0.4779631 | 0.008087 |
| 11715532_a_at | IFNGR2 | interferon gamma receptor 2 (interferon gamma transducer 1) | NM_005534 | Hs.634632 | 0.479853 | 0.000377 |
| 11734712_a_at | PDE4B | phosphodiesterase 4B, cAMP-specific | NM_001037339 | Hs.198072 | 0.4804832 | 0.002019 |
| 11719018_at | CBFB | core-binding factor, beta subunit | NM_001755 | Hs.460988 | 0.4809265 | 0.001937 |
| 11725366_s_at | IER5L | immediate early response 5-like | NM_203434 | Hs.529857 | 0.4810712 | 0.000472 |
| 11746302_a_at | POLR1B | polymerase (RNA) I polypeptide B, 128kDa | NM_001137604 | Hs.86337 | 0.48138 | 0.001747 |
| 11723324_at | HOXC10 | homeobox C10 | NM_017409 | Hs.44276 | 0.4827867 | 0.003034 |
| 11755321_x_at | POLR1B | polymerase (RNA) I polypeptide B, 128kDa | NM_001137604 | Hs.86337 | 0.4843773 | 0.002484 |
| 11751592_a_at | WDR3 | WD repeat domain 3 | NM_006784 | Hs.310809 | 0.4848775 | 0.000589 |
| 11716631_s_at | SERPINB2 | serpin peptidase inhibitor, clade B (ovalbumin), member 2 | NM_001143818 | Hs.594481 | 0.4854064 | 0.003033 |
| 11744382_a_at | WDR74 | WD repeat domain 74 | NM_018093 | Hs.655372 | 0.4878369 | 0.007103 |
| 11739324_a_at | WDR4 | WD repeat domain 4 | NM_018669 | Hs.248815 | 0.4884849 | 0.000466 |
| 11754297_s_at | TNFRSF1A | tumor necrosis factor receptor superfamily, member 1A | NM_001065 | Hs.713833 | 0.4892841 | 0.001300 |
| 11754712_a_at | TBC1D10A | TBC1 domain family, member 10A | NM_031937 | Hs.655273 | 0.4893823 | 0.001000 |
| 11733250_at | ARHGAP31 | Rho GTPase activating protein 31 | NM_020754 | Hs.668218 | 0.4895453 | 0.009780 |
| 11756965_a_at | RRP1 | ribosomal RNA processing 1 homolog (S. cerevisiae) | NM_003683 | Hs.110757 | 0.4901834 | 0.000643 |
| 11755796_a_at | ADAM9 | ADAM metallopeptidase domain 9 | NM_003816 | Hs.591852 | 0.4910645 | 0.009189 |
| 11737158_at | SLC9A2 | solute carrier family 9 (sodium/hydrogen exchanger), member 2 | NM_003048 | Hs.250083 | 0.4917681 | 0.003794 |
| 11732194_s_at | KPNA4 | karyopherin alpha 4 (importin alpha 3) | NM_002268 | Hs.715552 | 0.4921714 | 0.001232 |
| 11726005_a_at | PDE4B | phosphodiesterase 4B, cAMP-specific | NM_001037339 | Hs.198072 | 0.4927413 | 0.003047 |
| 11725670_s_at | IPO7 | importin 7 | NM_006391 | Hs.718440 | 0.4928719 | 0.004163 |
| 11722414_at | SLC7A1 | solute carrier family 7 (cationic amino acid transporter, y+ system), member 1 | NM_003045 | Hs.14846 | 0.4930368 | 0.003072 |
| 11729156_a_at | SLC25A32 | solute carrier family 25, member 32 | NM_030780 | Hs.607819 | 0.4940695 | 0.002552 |
| 11739346_s_at | TNFRSF1A | tumor necrosis factor receptor superfamily, member 1A | NM_001065 | Hs.279594 | 0.4952946 | 0.000198 |
| 11734708_at | C5orf43 | chromosome 5 open reading frame 43 | NM_001048249 | Hs.508479 | 0.495897 | 0.000551 |
| 11752814_s_at | TNFRSF1A | tumor necrosis factor receptor superfamily, member 1A | NM_001065 | Hs.279594 | 0.4973054 | 0.000865 |
| 11732844_a_at | MICAL3 | microtubule associated monoxygenase, calponin and LIM domain containing 3 | NM_001122731 | Hs.528024 | 0.4978979 | 0.002151 |
| **Probe Set ID** | **Gene Symbol** | **Description** | **Genbank**  **AccessionID** | **UniGeneID** | **Fold Change** | **p-value** |
| 11743077_s_at | CEBPB | CCAAT/enhancer binding protein (C/EBP), beta | NM_005194 | Hs.701858 | 0.4982563 | 0.003644 |
| 11729502_at | ASCC3 | activating signal cointegrator 1 complex subunit 3 | NM_006828 | Hs.486031 | 0.4982853 | 0.000093 |
| 11719017_a_at | CBFB | core-binding factor, beta subunit | NM_001755 | Hs.460988 | 0.4984083 | 0.004208 |
| 11755308_x_at | TMEM189 | transmembrane protein 189 | NM_001162505 | Hs.420529 | 0.4986042 | 0.000965 |
| 11732195_at | KPNA4 | karyopherin alpha 4 (importin alpha 3) | NM_002268 | Hs.715552 | 0.4998803 | 0.000417 |
| 11757352_a_at | TRMT1 | TRM1 tRNA methyltransferase 1 homolog (S. cerevisiae) | NM_001136035 | Hs.515169 | 0.4999343 | 0.000428 |

Supplementary Table S5. Genes in the downstream of FGFR2

| **Probe Set ID** | **Gene Symbol** | **Description** | **Genbank**  **AccessionID** | **UniGeneID** | **(DMSO+aFGF)/**  **DMSO** | **(AZD4547+aFGF)/**  **(DMSO+aFGF)** |
| --- | --- | --- | --- | --- | --- | --- |
| 11717566_at | EMP1 | epithelial membrane protein 1 | NM_001423 | Hs.707901 | 43.429 | 0.011 |
| 11717564_a_at | EMP1 | epithelial membrane protein 1 | NM_001423 | Hs.707901 | 28.390 | 0.027 |
| 11757312_x_at | SERPINE1 | serpin peptidase inhibitor, clade E (nexin, plasminogen activator inhibitor type 1), member 1 | NM_000602 | Hs.713079 | 25.492 | 0.037 |
| 11717565_s_at | EMP1 | epithelial membrane protein 1 | NM_001423 | Hs.707901 | 21.219 | 0.018 |
| 11746856_a_at | SERPINE1 | serpin peptidase inhibitor, clade E (nexin, plasminogen activator inhibitor type 1), member 1 | NM_000602 | Hs.414795 | 19.697 | 0.043 |
| 11720027_x_at | VGF | VGF nerve growth factor inducible | NM_003378 | Hs.718797 | 16.711 | 0.039 |
| 11721307_at | PHLDA1 | pleckstrin homology-like domain, family A, member 1 | NM_007350 | Hs.602085 | 16.685 | 0.026 |
| 11715636_a_at | SERPINE1 | serpin peptidase inhibitor, clade E (nexin, plasminogen activator inhibitor type 1), member 1 | NM_000602 | Hs.414795 | 14.424 | 0.075 |
| 11720026_a_at | VGF | VGF nerve growth factor inducible | NM_003378 | Hs.718797 | 13.870 | 0.048 |
| 11721305_a_at | PHLDA1 | pleckstrin homology-like domain, family A, member 1 | NM_007350 | Hs.602085 | 11.553 | 0.030 |
| 11717862_x_at | EGR1 | early growth response 1 | NM_001964 | Hs.326035 | 9.593 | 0.034 |
| 11717860_a_at | EGR1 | early growth response 1 | NM_001964 | Hs.326035 | 8.756 | 0.019 |
| 11752940_a_at | EGR1 | early growth response 1 | NM_001964 | Hs.326035 | 8.576 | 0.022 |
| 11754334_s_at | EGR1 | early growth response 1 | NM_001964 | Hs.708393 | 8.210 | 0.027 |
| 11758619_s_at | LIF | leukemia inhibitory factor (cholinergic differentiation factor) | NM_002309 | Hs.605598 | 7.712 | 0.072 |
| 11716663_a_at | GDF15 | growth differentiation factor 15 | NM_004864 | Hs.616962 | 7.589 | 0.066 |
| 11729128_at | CPA4 | carboxypeptidase A4 | NM_001163446 | Hs.93764 | 7.299 | 0.114 |
| 11716665_s_at | GDF15 | growth differentiation factor 15 | NM_004864 | Hs.616962 | 7.204 | 0.052 |
| 11726497_at | LIF | leukemia inhibitory factor (cholinergic differentiation factor) | NM_002309 | Hs.2250 | 6.789 | 0.131 |
| 11717861_a_at | EGR1 | early growth response 1 | NM_001964 | Hs.326035 | 6.230 | 0.064 |
| 11718779_at | S100A2 | S100 calcium binding protein A2 | NM_005978 | Hs.516484 | 6.211 | 0.139 |
| 11716664_x_at | GDF15 | growth differentiation factor 15 | NM_004864 | Hs.616962 | 6.111 | 0.079 |
| 11725767_at | CLCF1 | cardiotrophin-like cytokine factor 1 | NM_001166212 | Hs.502977 | 6.050 | 0.137 |
| 11726498_at | LIF | leukemia inhibitory factor (cholinergic differentiation factor) | NM_002309 | Hs.2250 | 5.425 | 0.113 |
| 11721308_at | PHLDA1 | pleckstrin homology-like domain, family A, member 1 | NM_007350 | Hs.602085 | 5.253 | 0.145 |
| 11734659_a_at | FOS | FBJ murine osteosarcoma viral oncogene homolog | NM_005252 | Hs.707896 | 4.528 | 0.128 |
| 11718397_s_at | JUN | jun proto-oncogene | NM_002228 | Hs.714791 | 4.396 | 0.223 |
| 11721911_at | SOX8 | SRY (sex determining region Y)-box 8 | NM_014587 | Hs.243678 | 4.310 | 0.159 |
| 11721092_a_at | THBS1 | thrombospondin 1 | NM_003246 | Hs.164226 | 4.130 | 0.217 |
| **Probe Set ID** | **Gene Symbol** | **Description** | **Genbank**  **AccessionID** | **UniGeneID** | **(DMSO+aFGF)/**  **DMSO** | **(AZD4547+aFGF)/**  **(DMSO+aFGF)** |
| 11751643_x_at | EGR1 | early growth response 1 | NM_001964 | Hs.326035 | 3.983 | 0.128 |
| 11745020_a_at | TNFRSF12A | tumor necrosis factor receptor superfamily, member 12A | NM_016639 | Hs.355899 | 3.973 | 0.133 |
| 11747820_x_at | UPP1 | uridine phosphorylase 1 | NM_003364 | Hs.488240 | 3.913 | 0.220 |
| 11718395_s_at | JUN | jun proto-oncogene | NM_002228 | Hs.714791 | 3.891 | 0.244 |
| 11744953_a_at | ANXA1 | annexin A1 | NM_000700 | Hs.494173 | 3.889 | 0.205 |
| 11721093_a_at | THBS1 | thrombospondin 1 | NM_003246 | Hs.164226 | 3.866 | 0.237 |
| 11718394_at | JUN | jun proto-oncogene | NM_002228 | Hs.714791 | 3.824 | 0.239 |
| 11725768_a_at | CLCF1 | cardiotrophin-like cytokine factor 1 | NM_001166212 | Hs.502977 | 3.790 | 0.247 |
| 11717514_a_at | ANXA1 | annexin A1 | NM_000700 | Hs.494173 | 3.786 | 0.222 |
| 11720030_a_at | SCG2 | secretogranin II | NM_003469 | Hs.516726 | 3.771 | 0.338 |
| 11744954_x_at | ANXA1 | annexin A1 | NM_000700 | Hs.494173 | 3.765 | 0.221 |
| 11725809_at | ARC | activity-regulated cytoskeleton-associated protein | NM_015193 | Hs.40888 | 3.710 | 0.207 |
| 11749291_a_at | FOS | FBJ murine osteosarcoma viral oncogene homolog | NM_005252 | Hs.707896 | 3.703 | 0.137 |
| 11716048_at | TRIB1 | tribbles homolog 1 (Drosophila) | NM_025195 | Hs.444947 | 3.642 | 0.278 |
| 11744955_a_at | ANXA1 | annexin A1 | NM_000700 | Hs.494173 | 3.604 | 0.208 |
| 11721306_at | PHLDA1 | pleckstrin homology-like domain, family A, member 1 | NM_007350 | Hs.602085 | 3.571 | 0.172 |
| 11715493_a_at | CYR61 | cysteine-rich, angiogenic inducer, 61 | NM_001554 | Hs.8867 | 3.569 | 0.264 |
| 11749378_a_at | CLCF1 | cardiotrophin-like cytokine factor 1 | NM_001166212 | Hs.502977 | 3.527 | 0.255 |
| 11759482_at | WWTR1 | WW domain containing transcription regulator 1 | NM_001168278 | Hs.719249 | 3.485 | 0.275 |
| 11737922_a_at | SERPINB8 | serpin peptidase inhibitor, clade B (ovalbumin), member 8 | NM_001031848 | Hs.368077 | 3.436 | 0.125 |
| 11725382_a_at | RAPGEF3 | Rap guanine nucleotide exchange factor (GEF) 3 | NM_001098531 | Hs.8578 | 3.389 | 0.300 |
| 11757721_s_at | CSRNP1 | cysteine-serine-rich nuclear protein 1 | NM_033027 | Hs.593170 | 3.369 | 0.261 |
| 11748775_a_at | UPP1 | uridine phosphorylase 1 | NM_003364 | Hs.488240 | 3.342 | 0.271 |
| 11722503_at | ITGB8 | integrin, beta 8 | NM_002214 | Hs.592171 | 3.227 | 0.232 |
| 11743682_s_at | KLF10 | Kruppel-like factor 10 | NM_001032282 | Hs.435001 | 3.226 | 0.213 |
| 11749103_a_at | ITGB8 | integrin, beta 8 | NM_002214 | Hs.592171 | 3.202 | 0.324 |
| 11733068_s_at | KLF10 | Kruppel-like factor 10 | NM_001032282 | Hs.435001 | 3.200 | 0.222 |
| 11721091_a_at | THBS1 | thrombospondin 1 | NM_003246 | Hs.164226 | 3.196 | 0.334 |
| 11748180_a_at | SERPINB8 | serpin peptidase inhibitor, clade B (ovalbumin), member 8 | NM_001031848 | Hs.368077 | 3.181 | 0.137 |
| 11718631_at | SERTAD1 | SERTA domain containing 1 | NM_013376 | Hs.269898 | 3.162 | 0.259 |
| 11720618_s_at | TRIM9 | tripartite motif-containing 9 | NM_015163 | Hs.654750 | 3.154 | 0.298 |
| 11749905_a_at | CYR61 | cysteine-rich, angiogenic inducer, 61 | NM_001554 | Hs.8867 | 3.116 | 0.298 |
| 11725606_at | TRIM9 | tripartite motif-containing 9 | NM_015163 | Hs.654750 | 3.100 | 0.333 |
| 11751672_x_at | LGALS8 | lectin, galactoside-binding, soluble, 8 | NM_006499 | Hs.4082 | 3.084 | 0.388 |
| **Probe Set ID** | **Gene Symbol** | **Description** | **Genbank**  **AccessionID** | **UniGeneID** | **(DMSO+aFGF)/**  **DMSO** | **(AZD4547+aFGF)/**  **(DMSO+aFGF)** |
| 11719836_x_at | LGALS8 | lectin, galactoside-binding, soluble, 8 | NM_006499 | Hs.4082 | 3.057 | 0.347 |
| 11732321_a_at | PLAT | plasminogen activator, tissue | NM_000930 | Hs.491582 | 3.042 | 0.305 |
| 11726299_x_at | LGALS8 | lectin, galactoside-binding, soluble, 8 | NM_006499 | Hs.4082 | 3.038 | 0.318 |
| 11725983_at | BHLHE40 | basic helix-loop-helix family, member e40 | NM_003670 | Hs.719093 | 3.024 | 0.267 |
| 11754545_x_at | PLAT | plasminogen activator, tissue | NM_000930 | Hs.491582 | 2.953 | 0.281 |
| 11753073_a_at | TNFSF4 | tumor necrosis factor (ligand) superfamily, member 4 | NM_003326 | Hs.181097 | 2.908 | 0.330 |
| 11731896_a_at | TNFSF4 | tumor necrosis factor (ligand) superfamily, member 4 | NM_003326 | Hs.181097 | 2.882 | 0.301 |
| 11755099_a_at | WWTR1 | WW domain containing transcription regulator 1 | NM_001168278 | Hs.719249 | 2.834 | 0.296 |
| 11751671_a_at | LGALS8 | lectin, galactoside-binding, soluble, 8 | NM_006499 | Hs.4082 | 2.832 | 0.375 |
| 11720062_s_at | IER3 | immediate early response 3 | NM_003897 | Hs.591785 | 2.810 | 0.304 |
| 11759483_at | WWTR1 | WW domain containing transcription regulator 1 | NM_001168278 | Hs.719249 | 2.783 | 0.297 |
| 11726298_s_at | LGALS8 | lectin, galactoside-binding, soluble, 8 | NM_006499 | Hs.4082 | 2.776 | 0.312 |
| 11720617_at | TRIM9 | tripartite motif-containing 9 | NM_015163 | Hs.654750 | 2.769 | 0.329 |
| 11749809_a_at | PLAT | plasminogen activator, tissue | NM_000930 | Hs.491582 | 2.734 | 0.290 |
| 11740780_at | FOXD2 | forkhead box D2 | NM_004474 | Hs.166188 | 2.705 | 0.358 |
| 11724454_at | SLC22A4 | solute carrier family 22 (organic cation/ergothioneine transporter), member 4 | NM_003059 | Hs.310591 | 2.688 | 0.415 |
| 11726784_a_at | LRFN5 | leucine rich repeat and fibronectin type III domain containing 5 | NM_152447 | Hs.715685 | 2.680 | 0.296 |
| 11761141_x_at | LGALS8 | lectin, galactoside-binding, soluble, 8 | NM_006499 | Hs.4082 | 2.656 | 0.337 |
| 11736018_x_at | PXN | paxillin | NM_001080855 | Hs.446336 | 2.648 | 0.424 |
| 11724902_a_at | MAP3K14 | mitogen-activated protein kinase kinase kinase 14 | NM_003954 | Hs.404183 | 2.611 | 0.199 |
| 11717617_a_at | PXN | paxillin | NM_001080855 | Hs.446336 | 2.572 | 0.417 |
| 11727623_at | EID3 | EP300 interacting inhibitor of differentiation 3 | NM_001008394 | Hs.659857 | 2.539 | 0.429 |
| 11749054_x_at | PXN | paxillin | NM_001080855 | Hs.446336 | 2.533 | 0.430 |
| 11725632_at | NR4A2 | nuclear receptor subfamily 4, group A, member 2 | NM_006186 | Hs.563344 | 2.531 | 0.351 |
| 11753670_a_at | AP1S3 | adaptor-related protein complex 1, sigma 3 subunit | NM_001039569 | Hs.632555 | 2.523 | 0.311 |
| 11736826_at | DHH | desert hedgehog | NM_021044 | Hs.524382 | 2.510 | 0.339 |
| 11717618_s_at | PXN | paxillin | NM_001080855 | Hs.446336 | 2.493 | 0.468 |
| 11739541_a_at | PIK3R1 | phosphoinositide-3-kinase, regulatory subunit 1 (alpha) | NM_181504 | Hs.132225 | 2.489 | 0.401 |
| 11760109_at | TMEM41B | transmembrane protein 41B | NM_001165030 | Hs.594563 | 2.471 | 0.335 |
| 11719837_a_at | LGALS8 | lectin, galactoside-binding, soluble, 8 | NM_006499 | Hs.4082 | 2.454 | 0.370 |
| **Probe Set ID** | **Gene Symbol** | **Description** | **Genbank**  **AccessionID** | **UniGeneID** | **(DMSO+aFGF)/**  **DMSO** | **(AZD4547+aFGF)/**  **(DMSO+aFGF)** |
| 11728311_x_at | ERCC1 | excision repair cross-complementing rodent repair deficiency, complementation group 1 (includes overlapping antisense sequence) | NM_001166049 | Hs.435981 | 2.451 | 0.386 |
| 11748670_a_at | PIK3R1 | phosphoinositide-3-kinase, regulatory subunit 1 (alpha) | NM_181504 | Hs.132225 | 2.450 | 0.377 |
| 11741056_a_at | ADORA2B | adenosine A2b receptor | NM_000676 | Hs.167046 | 2.426 | 0.250 |
| 11736017_s_at | PXN | paxillin | NM_001080855 | Hs.446336 | 2.426 | 0.475 |
| 11726611_x_at | MAFF | v-maf musculoaponeurotic fibrosarcoma oncogene homolog F (avian) | NM_001161572 | Hs.517617 | 2.412 | 0.362 |
| 11754631_x_at | PIK3R1 | phosphoinositide-3-kinase, regulatory subunit 1 (alpha) | NM_181504 | Hs.132225 | 2.399 | 0.406 |
| 11739539_a_at | PIK3R1 | phosphoinositide-3-kinase, regulatory subunit 1 (alpha) | NM_181504 | Hs.132225 | 2.393 | 0.423 |
| 11731026_a_at | CREM | cAMP responsive element modulator | NM_001881 | Hs.200250 | 2.384 | 0.367 |
| 11726381_a_at | TMEM41B | transmembrane protein 41B | NM_001165030 | Hs.594563 | 2.361 | 0.385 |
| 11764156_s_at | TMEM41B | transmembrane protein 41B | NM_001165030 | Hs.644671 | 2.352 | 0.363 |
| 11719830_a_at | ERCC1 | excision repair cross-complementing rodent repair deficiency, complementation group 1 (includes overlapping antisense sequence) | NM_001166049 | Hs.435981 | 2.348 | 0.412 |
| 11717909_at | IGFBP6 | insulin-like growth factor binding protein 6 | NM_002178 | Hs.274313 | 2.344 | 0.420 |
| 11739540_a_at | PIK3R1 | phosphoinositide-3-kinase, regulatory subunit 1 (alpha) | NM_181504 | Hs.132225 | 2.318 | 0.406 |
| 11725631_a_at | NR4A2 | nuclear receptor subfamily 4, group A, member 2 | NM_006186 | Hs.563344 | 2.306 | 0.373 |
| 11721543_a_at | CSRNP1 | cysteine-serine-rich nuclear protein 1 | NM_033027 | Hs.370950 | 2.300 | 0.407 |
| 11725213_at | METTL7B | methyltransferase like 7B | NM_152637 | Hs.51483 | 2.292 | 0.284 |
| 11747399_x_at | PLAT | plasminogen activator, tissue | NM_000930 | Hs.491582 | 2.277 | 0.347 |
| 11724478_s_at | FOSL1 | FOS-like antigen 1 | NM_005438 | Hs.283565 | 2.265 | 0.206 |
| 11731183_a_at | TFPI | tissue factor pathway inhibitor (lipoprotein-associated coagulation inhibitor) | NM_001032281 | Hs.516578 | 2.248 | 0.428 |
| 11732196_x_at | KPNA4 | karyopherin alpha 4 (importin alpha 3) | NM_002268 | Hs.715552 | 2.248 | 0.380 |
| 11733019_a_at | PIK3R1 | phosphoinositide-3-kinase, regulatory subunit 1 (alpha) | NM_181504 | Hs.132225 | 2.231 | 0.451 |
| 11719490_a_at | TMEM189 | transmembrane protein 189 | NM_001162505 | Hs.420529 | 2.221 | 0.458 |
| 11715359_a_at | TIMP1 | TIMP metallopeptidase inhibitor 1 | NM_003254 | Hs.522632 | 2.211 | 0.388 |
| 11759435_at | HECTD2 | HECT domain containing 2 | NM_173497 | Hs.596096 | 2.207 | 0.446 |
| 11740030_s_at | CREM | cAMP responsive element modulator | NM_001881 | Hs.200250 | 2.200 | 0.406 |
| 11742840_x_at | HSD17B1 | hydroxysteroid (17-beta) dehydrogenase 1 | NM_000413 | Hs.654385 | 2.199 | 0.318 |
| 11715360_x_at | TIMP1 | TIMP metallopeptidase inhibitor 1 | NM_003254 | Hs.522632 | 2.194 | 0.402 |
| **Probe Set ID** | **Gene Symbol** | **Description** | **Genbank**  **AccessionID** | **UniGeneID** | **(DMSO+aFGF)/**  **DMSO** | **(AZD4547+aFGF)/**  **(DMSO+aFGF)** |
| 11758522_s_at | CREM | cAMP responsive element modulator | NM_001881 | Hs.600170 | 2.186 | 0.420 |
| 11729574_at | ENC1 | ectodermal-neural cortex 1 (with BTB-like domain) | NM_003633 | Hs.104925 | 2.169 | 0.411 |
| 11731027_s_at | CREM | cAMP responsive element modulator | NM_001881 | Hs.200250 | 2.167 | 0.398 |
| 11724479_x_at | FOSL1 | FOS-like antigen 1 | NM_005438 | Hs.283565 | 2.158 | 0.251 |
| 11750408_a_at | CD97 | CD97 molecule | NM_001025160 | Hs.466039 | 2.158 | 0.440 |
| 11747398_a_at | PLAT | plasminogen activator, tissue | NM_000930 | Hs.491582 | 2.155 | 0.394 |
| 11723448_x_at | MALL | mal, T-cell differentiation protein-like | NM_005434 | Hs.185055 | 2.143 | 0.287 |
| 11745756_a_at | TMEM41B | transmembrane protein 41B | NM_001165030 | Hs.594563 | 2.138 | 0.382 |
| 11756746_s_at | C11orf17 /// NUAK2 | chromosome 11 open reading frame 17 /// NUAK family, SNF1-like kinase, 2 | NM_020642 | Hs.497512 | 2.134 | 0.421 |
| 11758119_s_at | TMEM41B | transmembrane protein 41B | NM_001165030 | Hs.594413 | 2.134 | 0.394 |
| 11749948_x_at | HSD17B1 | hydroxysteroid (17-beta) dehydrogenase 1 | NM_000413 | Hs.654385 | 2.133 | 0.325 |
| 11754712_a_at | TBC1D10A | TBC1 domain family, member 10A | NM_031937 | Hs.655273 | 2.124 | 0.489 |
| 11715673_x_at | JUNB | jun B proto-oncogene | NM_002229 | Hs.25292 | 2.119 | 0.339 |
| 11756581_s_at | PRSS23 | protease, serine, 23 | NM_007173 | Hs.25338 | 2.114 | 0.459 |
| 11753829_a_at | PLAT | plasminogen activator, tissue | NM_000930 | Hs.491582 | 2.113 | 0.441 |
| 11723447_at | MALL | mal, T-cell differentiation protein-like | NM_005434 | Hs.185055 | 2.097 | 0.289 |
| 11747474_a_at | NR4A2 | nuclear receptor subfamily 4, group A, member 2 | NM_006186 | Hs.563344 | 2.075 | 0.438 |
| 11755308_x_at | TMEM189 | transmembrane protein 189 | NM_001162505 | Hs.420529 | 2.061 | 0.499 |
| 11724932_at | CREM | cAMP responsive element modulator | NM_001881 | Hs.200250 | 2.051 | 0.440 |
| 11719842_x_at | PHLDA3 | pleckstrin homology-like domain, family A, member 3 | NM_012396 | Hs.268557 | 2.036 | 0.274 |
| 11749852_s_at | FOS | FBJ murine osteosarcoma viral oncogene homolog | NM_005252 | Hs.707896 | 2.027 | 0.388 |
| 11732195_at | KPNA4 | karyopherin alpha 4 (importin alpha 3) | NM_002268 | Hs.715552 | 2.013 | 0.500 |
| 11732194_s_at | KPNA4 | karyopherin alpha 4 (importin alpha 3) | NM_002268 | Hs.715552 | 2.008 | 0.492 |
